1 Experimentally-validated correlation analysis reveals new anaerobic  
2 methane oxidation partnerships with consortium-level heterogeneity in  
3 diazotrophy

4 Kyle S. Metcalfe\*, Ranjani Murali\*, Sean W. Mullin, Stephanie A. Connon, and Victoria J.

5 Orphan

6 \*Authors contributed equally to this work.

7

8 *Division of Geological and Planetary Sciences, California Institute of Technology, Pasadena, CA*

9 *USA*

10

11 <sup>1</sup> Correspondence: K.S. Metcalfe ([kmetcalf@caltech.edu](mailto:kmetcalf@caltech.edu)) or V.J. Orphan

12 ([vorphan@caltech.edu](mailto:vorphan@caltech.edu)), Division of Geological and Planetary Sciences, California Institute of

13 Technology, 1200 E. California Blvd., Mail Code 100-23, Pasadena, CA 91125, USA.

14

15 **Abstract**

16 Archaeal anaerobic methanotrophs ('ANME') and sulfate-reducing Deltaproteobacteria ('SRB')

17 form symbiotic multicellular consortia capable of anaerobic methane oxidation (AOM), and in so

18 doing modulate methane flux from marine sediments. The specificity with which ANME

19 associate with particular SRB partners *in situ*, however, is poorly understood. To characterize

20 partnership specificity in ANME-SRB consortia, we applied the correlation inference technique

21 SparCC to 310 16S rRNA Illumina iTag amplicon libraries prepared from Costa Rica sediment

22 samples, uncovering a strong positive correlation between ANME-2b and members of a clade of

23 Deltaproteobacteria we termed SEEP-SRB1g. We confirmed this association by examining 16S

24 rRNA diversity in individual ANME-SRB consortia sorted using flow cytometry and by imaging

25 ANME-SRB consortia with fluorescence *in situ* hybridization (FISH) microscopy using newly-

## Correlation analysis reveals new AOM partnerships

26 designed probes targeting the SEEP-SRB1g clade. Analysis of genome bins belonging to  
27 SEEP-SRB1g revealed the presence of a complete *nifHDK* operon required for diazotrophy,  
28 unusual in published genomes of ANME-associated SRB. Active expression of *nifH* in SEEP-  
29 SRB1g and diazotrophic activity within ANME-2b/SEEP-SRB1g consortia was then  
30 demonstrated by microscopy using hybridization chain-reaction (HCR-) FISH targeting *nifH*  
31 transcripts and by FISH-nanoSIMS experiments. NanoSIMS analysis of ANME-2b/SEEP-  
32 SRB1g consortia incubated with a headspace containing CH<sub>4</sub> and <sup>15</sup>N<sub>2</sub> revealed differences in  
33 cellular <sup>15</sup>N-enrichment between the two partners that varied between individual consortia, with  
34 SEEP-SRB1g cells enriched in <sup>15</sup>N relative to ANME-2b in one consortium and the opposite  
35 pattern observed in others, indicating both ANME-2b and SEEP-SRB1g are capable of nitrogen  
36 fixation, but with consortium-specific variation in whether the archaea or bacterial partner is the  
37 dominant diazotroph.

38

## 39 Introduction

40 The partnership between anaerobic, methanotrophic Archaea (ANME) and their associated  
41 sulfate-reducing bacteria (SRB) is one of the most biogeochemically-important symbioses in the  
42 deep-sea methane cycle [1, 2]. As a critical component of methane seep ecosystems,  
43 multicellular consortia of ANME and associated SRB consume a significant fraction of the  
44 methane produced in marine sediments, using sulfate as a terminal electron acceptor to perform  
45 the anaerobic oxidation of methane (AOM) [1–4]. ANME-SRB consortia are thought to perform  
46 AOM through the direct extracellular transfer of electrons between ANME and SRB [5–7]. Along  
47 with symbiotic extracellular electron transfer, ANME-SRB consortia also exhibit other traits of  
48 mutualism such as the sharing of nutrients. For example, members of the ANME-2 clade have  
49 been reported to fix and share N with partner bacteria [8–11], but the extent to which

### *Correlation analysis reveals new AOM partnerships*

50 diazotrophic capability might vary across the diverse clades of ANME and associated SRB is  
51 the focus of ongoing research.

52  
53 Comparative studies of ANME [12] and associated SRB [13, 14] genomes from multiple ANME-  
54 SRB consortia have revealed significant diversity across clades, particularly for SRB genomes  
55 falling within subclades of the SEEP-SRB1 [14], common SRB partners to ANME [15]. However,  
56 the implications of symbiont diversity for metabolic adaptation in ANME-SRB consortia are  
57 obscured by the absence of clearly-established ANME-SRB pairings in the environment. A  
58 framework defining these pairings would address this gap in knowledge. Establishing this  
59 framework for partnership specificity in ANME-SRB consortia—being the preference that certain  
60 ANME exhibit for specific SRB partners—would shed light on the extent to which ANME or SRB  
61 physiology may differ in consortia constituted of different ANME-SRB pairs.

62  
63 As an aspect of ANME or SRB physiology that may differ in different ANME-SRB pairings,  
64 nitrogen anabolism has been observed to be involved in the symbiotic relationship between  
65 partners [8, 9] and has been shown to influence niche differentiation of different ANME-SRB  
66 consortia via nitrate assimilation ability [16]. Previous evidence documenting active diazotrophy  
67 in ANME-SRB consortia by nitrogenase expression [8] and  $^{15}\text{N}_2$  fixation by nanoSIMS indicated  
68 that ANME-2 are the primary diazotrophs in ANME-SRB consortia and supply fixed nitrogen to  
69 SRB partners [8–10]. The diazotrophic potential of syntrophic SRB, however, and their role in  
70 nitrogen fixation within consortia is poorly understood. Evidence from SRB genomes [14] and  
71 the expression of unidentified nitrogenase sequences in methane seep sediments [8] suggested  
72 that seep associated SRB may fix nitrogen, opening up the possibility of variation in diazotrophic  
73 activity among taxonomically-distinct ANME-SRB consortia.

74 Previous research characterizing the diversity of partnerships in ANME-SRB consortia have  
75 employed fluorescence microscopy, magnetic separation by magneto-FISH, and single-cell

## Correlation analysis reveals new AOM partnerships

76 sorting techniques (e.g. BONCAT-FACS) that are robust against false positives, but are often  
77 limited in statistical power. Fluorescence *in situ* hybridization (FISH) has helped to establish the  
78 diversity of ANME-bacterial associations, with ANME constituting four diverse polyphyletic  
79 clades within the Methanomicrobia: ANME-1a/b [4, 17–20], ANME-2a,b,c [3, 20–22] , ANME-2d  
80 [23, 24], and ANME-3 [20, 25, 26]. ANME-associated SRB have also observed by FISH to be  
81 diverse, representing several clades of Deltaproteobacteria including the  
82 *Desulfococcus/Desulfosarcina* (DSS) clade [3–6, 15, 19–22, 27–33], two separate subclades  
83 within the Desulfobulbaceae [16, 25, 26], a deeply-branching group termed the SEEP-SRB2  
84 [34], and a thermophilic clade of Desulfobacteraceae known as HotSeep-1 [34, 35]. These FISH  
85 studies documented associations for different ANME-SRB consortia, including partnerships  
86 between members of ANME-1 and SEEP-SRB2 [13] or HotSeep-1 [7, 13, 35], ANME-2a and  
87 SEEP-SRB1a [15], ANME-2c and SEEP-SRB1a [5], SEEP-SRB2 [13, 34], or Desulfobulbaceae  
88 [29], and ANME-3 and SEEP-SRB1a [15] or Desulfobulbaceae [25, 26]. Conspicuously, SRB  
89 found in consortia with ANME-2b have only been identified broadly as members of the  
90 Deltaproteobacteria targeted by the probe S-C-dProt-0495-a-A-18 (often referred to as  $\Delta$ 495) [5,  
91 31, 36], leaving little known about the specific identity of this SRB partner. Visualizing ANME-  
92 SRB partnerships by FISH has been a valuable aspect of AOM research, but FISH requires the  
93 design of probes with sufficient specificity to identify partner organisms and thus will only detect  
94 partnerships consisting of taxa for which phylogenetic information is known [22]. Magneto-FISH  
95 [29, 37, 38] or BONCAT-enabled fluorescence-activated cell sorting (BONCAT-FACS) of single  
96 ANME-SRB consortia [39] complement FISH experiments by physical capture (via magnetic  
97 beads or flow cytometry, respectively) and sequencing of ANME and associated SRB from  
98 sediment samples. These studies corroborated some of the patterns observed from FISH  
99 experiments, showing associations between ANME-2 and diverse members of the DSS [39].  
100 Magneto-FISH and BONCAT-FACS observations of ANME-SRB pairings are also highly robust

*Correlation analysis reveals new AOM partnerships*

101 against false positives but can lack the statistical power conferred by more high-throughput  
102 approaches that is necessary to establish a general framework for partnership specificity.  
103  
104 Recently, a number of correlation analysis techniques have been introduced in molecular  
105 microbial ecology studies, providing information about patterns of co-occurrence between 16S  
106 rRNA OTUs or ASVs recovered from environmental iTag [40] diversity surveys [41–43].  
107 Correlation analysis performed on 16S rRNA amplicon surveys provides a complementary  
108 method to Magneto-FISH and/or BONCAT-FACS that can be used to develop hypotheses about  
109 potential microbial interactions. While predictions of co-occurrence between phylotypes from  
110 these correlation analysis techniques have been reported in a number of diverse environments,  
111 they are rarely validated through independent approaches, with a few notable exceptions [44].  
112  
113 Here, we present a framework for ANME-SRB partnership specificity, using correlation analysis  
114 of 16S iTag amplicon sequences from a large-scale survey of seafloor methane seep sediments  
115 near Costa Rica to predict potential ANME-SRB partnerships. A partnership between ANME-2b  
116 and members of an SRB group previously not known to associate with ANME (SEEP-SRB1g)  
117 was hypothesized by correlation analysis and independently assessed using FISH and amplicon  
118 data from BONCAT-FACS-sorted ANME-SRB consortia. With this new framework, we were  
119 able to identify a novel partnership between ANME-2b and SEEP-SRB1g and map predicted  
120 physiological traits of SEEP-SRB1g genomes onto partnership specificity with ANME-2b. Our  
121 approach led us to formulate new hypotheses regarding how SEEP-SRB1g physiology may  
122 complement ANME-2b physiology, focusing on nitrogen fixation in SEEP-SRB1g. We  
123 demonstrate in this study that the symbiotic relationship between ANME and associated SRB  
124 can vary depending on the nature of the partner taxa and affirm the importance of characterizing  
125 individual symbiont pairings in understanding AOM symbiosis.

126

## Correlation analysis reveals new AOM partnerships

### 127 Materials and Methods

128 Here, we present an abridged description of the methods used in this study. A full description  
129 can be found in the Supplemental Materials and Methods.

130

#### 131 *Sample origin and processing*

132 Pushcore samples of seafloor sediment were collected by DSV *Alvin* during the May 20-June 11  
133 2017 ROC HITS Expedition (AT37-13) aboard R/V *Atlantis* to methane seep sites southwest of  
134 Costa Rica [45–47]. After retrieval from the seafloor, sediment pushcores were extruded aboard  
135 R/V *Atlantis* and sectioned at 1-3 cm intervals for geochemistry and microbiological sampling  
136 using published protocols [21, 48]. Samples for DNA extraction were immediately frozen in  
137 liquid N<sub>2</sub> and stored at -80°C. Samples for microscopy were fixed in 2% paraformaldehyde for  
138 24 h at 4°C. A full list of samples used in this study can be found in Supplemental Table 1 and  
139 additional location and geochemical data can be found at [https://www.bco-](https://www.bco-dmo.org/dataset/715706)  
140 [dmo.org/dataset/715706](https://www.bco-dmo.org/dataset/715706).

141

#### 142 *DNA extraction and iTag sequencing*

143 DNA was extracted from 310 samples of Costa Rican methane seep sediments and seep  
144 carbonates (Supp. Table 1) using the Qiagen PowerSoil DNA Isolation Kit 12888 following  
145 manufacturer directions modified for sediment and carbonate samples [21, 49]. The V4-V5  
146 region of the 16S rRNA gene was amplified using archaeal/bacterial primers, 515F (5'-  
147 GTGYCAGCMGCCGCGGTAA-3') and 926R (5'-CCGYCAATTYMTTTRAGTTT-3') with Illumina  
148 adapters [50]. PCR reaction mix was set up in duplicate for each sample with New England  
149 Biolabs Q5 Hot Start High-Fidelity 2x Master Mix in a 15 µL reaction volume with annealing  
150 conditions of 54°C for 30 cycles. Duplicate PCR samples were then pooled and 2.5 µL of each  
151 product was barcoded with Illumina NexteraXT index 2 Primers that include unique 8-bp

## Correlation analysis reveals new AOM partnerships

152 barcodes. Amplification with barcoded primers used annealing conditions of 66°C and 10  
153 cycles. Barcoded samples were combined into a single tube and purified with Qiagen PCR  
154 Purification Kit 28104 before submission to Laragen (Culver City, CA, USA) for 2 x 250 bp  
155 paired end analysis on Illumina's MiSeq platform. Sequence data was submitted to the NCBI  
156 Sequence Read Archive as Bioproject PRJNA623020. Sequence data was processed in QIIME  
157 version 1.8.0 [51] following Mason, et al. 2015 [52]. Sequences were clustered into *de novo*  
158 operational taxonomic units (OTUs) with 99% similarity [53], and taxonomy was assigned using  
159 the SILVA 119 database [54]. The produced table of OTUs detected in the 310 methane seep  
160 sediment and seep carbonate amplicon libraries was analyzed using the correlation algorithm  
161 SparCC [41]. To examine phylogenetic placement of SRB 16S rRNA gene amplicon sequences  
162 predicted by network analysis to associate with particular ANME subgroup amplicon sequences,  
163 a phylogeny was constructed using RAxML-HPC [55] on XSEDE [56] using the CIPRES  
164 Science Gateway [57] from full-length 16S rRNA sequences of Deltaproteobacteria aligned by  
165 MUSCLE [58]. Genomes downloaded from the IMG/M database were searched using tblastn.  
166 Chlorophyllide reductase BchX (WP011566468) was used as a reference sequence for a tblastn  
167 *nifH* search using BLAST+. Genome trees were constructed using the Anvi'o platform [59] using  
168 HMM profiles from a subset [60] of ribosomal protein sequences and visualized in iTOL [61].

169

### 170 *FISH probe design and microscopy*

171 A new FISH probe was designed in ARB [62]. This new probe, hereafter referred to as Seep1g-  
172 1443 (Supp. Table 2), was designed to complement and target 16S rRNA sequences in a  
173 monophyletic "*Desulfococcus* sp." clade. Based on phylogenetic analysis (see below), this clade  
174 was renamed SEEP-SRB1g. Seep1g-1443 was ordered from Integrated DNA Technologies  
175 (Coralville, IA, USA). FISH reaction conditions were optimized for Seep1g-1443, with optimal  
176 formamide stringency found to be 35% (Supp. Fig. 1). FISH and hybridization chain reaction  
177 (HCR-) FISH was performed on fixed ANME-SRB consortia using previously published density

## *Correlation analysis reveals new AOM partnerships*

178 separation and FISH protocols [22]. FISH was performed overnight (18 hr) using modifications  
179 (G. Chadwick, pers. comm.) to previously-published protocols [29, 39, 63, 64]. Structured-  
180 illumination microscopy (SIM) was performed on FISH and HCR-FISH (see below) experiments  
181 to image ANME-SRB consortia using the Elyra PS.1 SIM platform (Zeiss, Germany) and an  
182 alpha Plan-APOCHROMAT 100X/1.46 Oil DIC M27 objective. Zen Black software (Zeiss) was  
183 used to construct final images from the structured-illumination data.

184

### *mRNA imaging using HCR-FISH*

186 Hybridization chain reaction FISH (HCR-FISH) is a powerful technique to amplify signal from  
187 FISH probes [65, 66]. The protocol used here was modified from Yamaguchi and coworkers  
188 [67]. *nifH* initiators, purchased from Molecular Technologies (Pasadena, CA, USA; probe  
189 identifier “nifH 3793/D933”) or designed in-house (Supp. Table 2) and ordered from Integrated  
190 DNA Technologies, were hybridized to fixed ANME-SRB consortia. Hairpins B1H1 and B1H2  
191 with attached Alexa647 fluorophores (Molecular Technologies) were added separately to two 45  
192  $\mu$ L volumes of amplification buffer in PCR tubes and snap cooled by placement in a C1000  
193 Touch Thermal Cycler (BioRad, Hercules, CA, USA) for 3 min at 95°C. After 30 min at room  
194 temperature, hairpins were mixed and placed in PCR tubes along with hybridized ANME-SRB  
195 consortia. Amplification was performed for 15 min at 35°C. Similar results were observed when  
196 the HCR-FISH v3.0 protocol established by Choi et al. [68] was used.

197

### *Stable Isotope Probing and nanoSIMS*

199 Methane seep sediments containing abundant ANME-2b and SEEP-SRB1g consortia (Supp.  
200 Fig. 4) were used in stable isotope probing (SIP) experiments to test for diazotrophic activity by  
201 SEEP-SRB1g. N sources were removed from the sediment slurry by washing with artificial  
202 seawater without an N source (see Supplemental Materials and Methods). Two anoxic  
203 incubations were pressurized with 2.8 bar  $\text{CH}_4$  with 1.2 mL  $^{15}\text{N}_2$  at 1 bar, approximately



## *Correlation analysis reveals new AOM partnerships*

204 equivalent to 2% headspace in 20 mL CH<sub>4</sub> at 2.8 bar (Supp. Table 3). Positive control  
205 incubations ( $n = 2$ ) were amended with <sup>15</sup>NH<sub>4</sub>Cl and were further pressurized with 2.8 bar CH<sub>4</sub>  
206 and 1.2 mL natural-abundance N<sub>2</sub> at 1 bar. Incubations were periodically checked for AOM  
207 activity via sulfide production using the Cline assay [69] and were chemically fixed for FISH-  
208 nanoSIMS analysis [70] after 9 months. Fixed ANME-SRB consortia were separated from the  
209 sediment matrix and concentrated following published protocols [5]. Samples were then  
210 embedded in Technovit H8100 (Kulzer GmbH, Germany) resin according to published protocols  
211 [5, 31] and thin sections (2 μm thickness) were prepared using an Ultracut E microtome  
212 (Reichert AG, Austria) which were mounted on Teflon/poly-L-lysine slides (Tekdon Inc., USA).  
213 FISH reactions were performed using Seep1g-1443 and ANME-2b-729 probes as described  
214 above, with the omission of 10% SDS to prevent detachment of section from slide (G.  
215 Chadwick, pers. comm.), and slides were imaged and mapped for subsequent nanoSIMS  
216 analysis using a Zeiss Elyra PS.1 platform. After removal of DAPI-Citifuor by washing following  
217 published protocols [70], slides were cut to fit into nanoSIMS sample holders and sputter-coated  
218 with 40 nm Au using a Cressington sputter coater. NanoSIMS was performed using a Cameca  
219 NanoSIMS 50L housed in Caltech's Microanalysis Center, and data was analyzed using  
220 look@nanoSIMS [71].

221

## 222 Results

223 *16S rRNA correlation analysis predicts a specific association between ANME-2b and SEEP-*  
224 *SRB1g*

225 Correlation analysis applied to 16S rRNA gene amplicon libraries has been frequently used to  
226 identify interactions between microorganisms based on the co-occurrence of their 16S rRNA  
227 sequences in different environments or conditions [72–75]. Here, we applied correlation analysis  
228 to 16S rRNA amplicon libraries prepared from Costa Rican methane seep sites (Supp. Table 1)

### Correlation analysis reveals new AOM partnerships

229 to explore partnership specificity between ANME and associated SRB. QIIME processing of  
230 amplicon sequences prepared from 310 Costa Rican methane seep sediment and seep  
231 carbonate samples yielded 3,052 OTUs after filtering in R. A table of read abundances for these  
232 OTUs across the 310 samples was analyzed by SparCC to calculate correlation coefficients and  
233 significance for all possible 4,658,878 OTU pairs using 100 bootstraps (Fig. 1). Of these pairs,  
234 9.7% (452,377) had pseudo- $p$ -values  $< 0.01$ , indicating the coefficients for each of these  
235 correlations exceeded that calculated for that same OTU pair in any of the 100 bootstrapped  
236 datasets [41]. The taxonomic assignment of the constituent OTUs of correlations with pseudo- $p$   
237  $< 0.01$  were then inspected, where 18% (81,459) of correlations with pseudo- $p < 0.01$  describe  
238 those involving ANME. Of these, 32% occur between ANME and OTUs assigned to three main  
239 taxa: *Desulfococcus* sp., SEEP-SRB1a, and SEEP-SRB2 (Fig. 1). A complete list of significant  
240 correlations, their coefficient values, OTU identifiers, and accompanying taxonomy assignments  
241 can be found in Supplemental Table 4.

242  
243 16S rRNA phylogenetic analysis revealed the SILVA-assigned “*Desulfococcus* sp.” OTUs  
244 comprise a sister clade to the SEEP-SRB1a that is distinct from cultured *Desulfococcus* sp.  
245 (e.g. *D. oleovorans* and *D. multivorans*, see below). We therefore reassigned the *Desulfococcus*  
246 OTUs to a new clade we termed SEEP-SRB1g following the naming scheme outlined for seep-  
247 associated SRB in Schreiber, et al. (e.g. SEEP-SRB1a through -SRB1f) [15]. Furthermore,  
248 statistically-significant correlations between OTUs of ANME and SRB taxa suggested that  
249 ANME-SRB partnerships in the Costa Rica seep samples could be classified into the following  
250 types: ANME-1 with SEEP-SRB1a or SEEP-SRB2, ANME-2a with SEEP-SRB1a, ANME-2b  
251 with SEEP-SRB1g, ANME-2c with SEEP-SRB1a or SEEP-SRB2, and ANME-3 with SEEP-  
252 SRB1a (Fig. 1). While physical association between different ANME lineages and  
253 Deltaproteobacterial clades SEEP-SRB1a and SEEP-SRB2 had been well-documented [5, 13,

### *Correlation analysis reveals new AOM partnerships*

254 15, 31, 34], members of the SEEP-SRB1g had not previously been identified as a potential  
255 syntrophic partner with methanotrophic ANME.  
256  
257 These associations were further examined by detailed network analysis in which the table of  
258 correlations with pseudo  $p$ -values  $< 0.01$  was further filtered to contain only those correlations  
259 with coefficients (a measure of correlation strength) in the 99<sup>th</sup> percentile of all significant  
260 correlations. A network diagram in which nodes represent OTUs and edges between nodes  
261 represent correlations was constructed with force-directed methods [76], where edge length  
262 varied in inverse proportion to correlation strength. A subregion of this network focused on  
263 ANME-associated OTUs is presented in Figure 2a. Cohesive blocks, subsets of the graph with  
264 greater connectivity to other nodes in the block than to nodes outside [77], were calculated and  
265 revealed 3 primary blocks of ANME and SRB OTUs. Visualization of these 3 blocks by a chord  
266 diagram [78] further highlighted the taxonomic identity of ANME-SRB OTU pairs in these blocks:  
267 ANME-1 or ANME-2c (one OTU with mean read count  $< 10$ ) and SEEP-SRB2, ANME-2a or  
268 ANME-2c and SEEP-SRB1a, and ANME-2b or ANME-2a and SEEP-SRB1g (Fig. 2b). The  
269 predicted associations between ANME-2c and SEEP-SRB2 and between ANME-2a and SEEP-  
270 SRB1g were relatively more rare than the other associations; only one rare ANME-2c OTU  
271 (mean read count  $< 10$ ) and four uncommon ANME-2a OTUs (mean read count  $< 100$ ) were  
272 predicted between SEEP-SRB2 and SEEP-SRB1g, respectively. Inferred partnership specificity  
273 in two of the blocks has been previously corroborated by FISH studies, namely that exhibited by  
274 ANME-1 with SEEP-SRB2 [13, 34], ANME-2c with SEEP-SRB1a [5], and ANME-2a with SEEP-  
275 SRB1a [15]. The partnership between SEEP-SRB1g and ANME-2b, however, had no  
276 precedent, as the only previous FISH descriptions of ANME-2b had placed it with a partner  
277 *Deltaproteobacterium* with taxonomy not known beyond the phylum level [5, 31].  
278

*Correlation analysis reveals new AOM partnerships*

279 *Common patterns of association observed in network analysis and in single ANME-SRB*

280 *consortia*

281 To test if ANME-SRB partnership specificity observed in our iTag correlation analysis from seep  
282 samples (Figs. 1, 2) was consistent with data collected from individually-sorted ANME-SRB  
283 consortia after BONCAT-FACS [39], we constructed a phylogeny with full-length and amplicon  
284 16S rRNA sequences from ANME-associated SRB including SEEP-SRB1g (Fig. 3; Supp. Fig  
285 5). 16S rRNA iTag amplicon sequences from the network analysis (Fig. 2) and from BONCAT-  
286 FACS sorted consortia (Fig. 3; [39]) were then annotated by ANME subtype and identity of  
287 associated phylotypes. In the BONCAT-FACS dataset, 8 out of 11 (72%) of the consortia with  
288 ANME-2b OTUs had corresponding deltaproteobacterial OTUs that belonged to the SEEP-  
289 SRB1g clade (Fig. 3). Similarly, of the Deltaproteobacteria OTU sequences from the BONCAT-  
290 FACS sorted consortia affiliated with SEEP-SRB1g 89% (8/9) had ANME-2b as the archaeal  
291 partner (Fig. 3). Notably, we found that these SEEP-SRB1g sequences were also highly-similar  
292 to published full-length 16S rRNA clone library sequences (e.g. NCBI accession AF354159)  
293 from seep sediments where ANME-2b phylotypes were also recovered [21]. A  $\chi^2$ -test for  
294 independence was performed on 16S rRNA OTUs recovered from (39) to test the null  
295 hypothesis that the presence of a given SRB taxon in a FACS sort is independent of the type of  
296 ANME present in the sort. This test demonstrated that the SRB taxon found in a given sort was  
297 dependent on the ANME also present in the sort,  $\chi^2 = 30.6$  (*d.f.* = 6, *n* = 30), *p* < 0.001. The  
298 pattern of association between ANME and SRB OTUs in individual BONCAT-FACS-sorted  
299 ANME-SRB consortia thus corroborated the inference from network analysis that ANME-2b and  
300 SEEP-SRB1g OTUs exhibit significant partnership specificity. On the basis of amplicon  
301 sequence associations found from the BONCAT-FACS sorting dataset as well as those  
302 displayed by correlation analysis of amplicons from Costa Rica methane seeps, we designed a  
303 set of independent experiments to test the hypothesis that ANME-2b form syntrophic  
304 partnerships with the previously-undescribed SEEP-SRB1g deltaproteobacteria.

## Correlation analysis reveals new AOM partnerships

305

306 *FISH experiments show SEEP-SRB1g in association with ANME-2b*

307 Specific oligonucleotide probes were designed and tested for the SEEP-SRB1g clade (Supp.

308 Fig. 1) and FISH experiments were used to validate the predicted ANME-2b—SEEP-SRB1g

309 partnership. Simultaneous application of FISH probes targeting SEEP-SRB1a, the dominant

310 deltaproteobacterial partner of ANME (Seep1a-1441 [15]), the newly designed SEEP-SRB1g

311 probe (Seep1g-1443, this work), and a probe targeting ANME-2b (ANME-2b-729 [39])

312 demonstrated that ANME-2b predominantly form consortia with SEEP-SRB1g, appearing as

313 large multicellular consortia in seep sediment samples from different localities at Costa Rica

314 methane seep sites (see Supplemental Materials and Methods for site details) that also contain

315 ANME-2a (Fig. 4b) and ANME-2c (Fig. 4f). ANME-2b was not observed in association with

316 SEEP-SRB1a (Figs. 4a, 4e), and SEEP-SRB1g was not observed in association with ANME-2a

317 (Fig. 4d) or ANME-2c (Fig. 4h) when FISH probes ANME-2a-828 or ANME-2c-760 [20] were

318 substituted for ANME-2b-729 ( $n \approx 100$  consortia). Instead, SEEP-SRB1a was found in consortia

319 with ANME-2a (Fig. 4c) and ANME-2c (Fig. 4g), consistent with previous reports [15].

320

321 *Genomic potential for  $N_2$  fixation in sulfate-reducing SEEP-SRB1g deltaproteobacteria*

322 Given the importance of diazotrophy in the functioning of ANME-SRB syntrophy, we screened

323 metagenome-assembled genome bins (MAGs) of SEEP-SRB1g for the presence of the

324 nitrogenase operon. A genome tree constructed from previously published MAGs from Hydrate

325 Ridge and Santa Monica Basin [14, 39] revealed that two closely related MAGs

326 (*Desulfobacterales* sp. C00003104, and C00003106) originally classified as belonging to the

327 Seep-SRB1c clade [14] possessed the nitrogenase operon (Fig. 5). These MAGs did not

328 possess 16S rRNA genes, precluding 16S rRNA-based taxonomic identification. A more

329 detailed look at these reconstructed genomes revealed that the nitrogenase along with a suite of

330 other genes were unique to this subclade and missing in other SEEP-SRB1c MAGs [14],

### Correlation analysis reveals new AOM partnerships

331 suggesting they may represent a distinct lineage. In effort to connect these nitrogenase  
332 containing SRB MAG's with representative 16S rRNA sequences, we examined mini-  
333 metagenome data from individual BONCAT-FACS sorted ANME-SRB consortia which each  
334 contained 16S rRNA gene sequences for the ANME and bacterial partner [39]. A genome tree  
335 containing deltaproteobacterial MAGs from Skennerton, et al. [14] and reconstructed  
336 deltaproteobacterial genomes from the BONCAT-FACS sorts [39] revealed one SRB genome  
337 from a FACS-sorted consortium (Desulfobacterales sp. CONS3730E01UFb1, IMG Genome ID  
338 3300009064) was closely related to the two putative Seep-SRB1c MAGs containing the  
339 nitrogenase operon (Fig. 5). The 16S rRNA amplicon sequence (NCBI accession KT945234)  
340 associated with the Desulfobacterales sp. CONS3730E01UFb1 genome was used to construct  
341 a 16S rRNA phylogeny and confirmed to cluster within the SEEP-SRB1g clade, providing a link  
342 between the 16S rRNA and associated nitrogenase sequences in this lineage (Fig. 3). Given  
343 that Desulfobacterales sp. CONS3730E01UFb1, C00003104, and C00003106 genomes  
344 appeared highly similar on the genome tree (Fig. 5), we reassigned the previously published  
345 Desulfobacterales sp. C00003104 and C00003106 MAGs to the SEEP-SRB1g. Notably, the  
346 other 16S rRNA amplicon sequence sampled from the sorted consortium CONS3730E01UF  
347 (NCBI accession KT945229) was assigned to ANME-2b [39].

348  
349 As noted above, these SEEP-SRB1g MAGs were remarkable for the presence of the *nifHDK*  
350 operon involved nitrogen fixation, which had previously not been an area of focus in previous  
351 analyses of ANME-associated SRB genomes (Fig. 5). A re-analysis of published *nifH* cDNA  
352 sequences from methane seep sediments revealed sequences that were nearly identical to the  
353 SEEP-SRB1g *nifH* (NCBI accession KR020451-KR020457, [8]) suggesting active transcription  
354 of SEEP-SRB1g *nifH* under *in situ* conditions (Fig. 6). An analysis of published methane seep  
355 metaproteomic data [14] also indicated active translation of nitrogenase by SEEP-SRB1g,  
356 corroborating evidence from cDNA libraries [8]. Additionally, other *nifH* cDNA sequences in this

### Correlation analysis reveals new AOM partnerships

357 study were found to be identical to nitrogenase sequences occurring in 18 SEEP-SRB1a  
358 unpublished metagenome bins (Supp. Fig. 6) demonstrating that at least some of the syntrophic  
359 SEEP-SRB1a SRB partners also possess and actively express *nifH*.

360

361 *Single-cell nifH expression visualized by HCR-FISH and <sup>15</sup>N<sub>2</sub> FISH-nanoSIMS experiments*  
362 *confirm involvement of SEEP-SRB1g in N<sub>2</sub>-fixation*

363 The dominant role of ANME-2 in nitrogen fixation reported by previous studies [8–10] motivated  
364 our examination of whether the sulfate-reducing SEEP-SRB1g partners of ANME-2b were also  
365 involved in diazotrophy, either in concert with the ANME-2b partner, or perhaps as the sole  
366 diazotroph in this AOM partnership. Using the *nifH* sequences from SEEP-SRB1g, we designed  
367 a specific mRNA-targeted probe set to use in whole-cell hybridization chain reaction FISH  
368 (HCR-FISH) assays (Supp. Table 2). HCR-FISH allows for signal amplification and improved  
369 signal-to-noise ratio compared to FISH, and has been used in single cell mRNA expression  
370 studies in select microbial studies [79–81]. Prior to this study, however, HCR-FISH had not been  
371 applied to visualize gene expression in ANME-SRB consortia from methane seep sediments. In  
372 the context of experiments with sediment-dwelling ANME-SRB consortia, HCR-FISH provided  
373 adequate amplification of the signal to detect expressed mRNA above the inherent background  
374 autofluorescence in sediments. Using our HCR-FISH probes targeting SEEP-SRB1g *nifH*  
375 mRNA together with the standard 16S rRNA targeted oligonucleotide FISH probes Seep1g-  
376 1443 (targeting SEEP-SRB1g) and ANME-2b-729 (targeting ANME-2b), we successfully  
377 imaged *nifH* mRNA transcripts by SEEP-SRB1g cells in ANME-2b—SEEP-SRB1g consortia in  
378 a sediment AOM microcosm experiment (Fig. 7). Positive HCR-FISH *nifH* hybridization in this  
379 sample was observed to be exclusively associated with the SEEP-SRB1g bacterial partner in  
380 ANME-2b consortia ( $n = 5$ ), and not observed in ANME-2b stained cells nor in ANME-2a or -2c  
381 consortia, supporting the specificity of this assay. Negative control experiments for the HCR-  
382 FISH reaction were also performed in which SEEP-SRB1g *nifH* initiator probes were added to

### *Correlation analysis reveals new AOM partnerships*

383 the assay, but the fluorescent amplifier hairpins were absent. In this case, there is no  
384 fluorescent signal in either the bacteria or archaeal partners in ANME-2b aggregates confirming  
385 that there is no native autofluorescence in Seep-SRB1g that could be responsible for the signal  
386 observed in the HCR-FISH experiments (Supp. Fig. 7f-j). We performed another control without  
387 the initiator probes that bind the mRNA but with the addition of the fluorescent amplifier hairpins.  
388 As in the other negative control, we observed limited non-specific binding of the hairpins that  
389 were easy to differentiate from the positively-hybridized SEEP-SRB1g (Supp. Fig. 7a-e).  
390 Occasionally, highly localized and small spots of hairpins were observed (Supp. Fig 7d) but  
391 these dots were mostly localized outside of aggregates and did not align with either bacteria or  
392 archaea in consortia (e.g. Figure 7d). Confirmation of *nifH* expression using HCR-FISH  
393 corroborated evidence from cDNA libraries (Fig. 6) that SEEP-SRB1g actively express *nifH*,  
394 providing support for diazotrophy in the sulfate-reducing partner in ANME-2b—SEEP-SRB1g  
395 consortia.  
396  
397 To confirm active diazotrophy by ANME-2b-associated SEEP-SRB1g, we prepared stable  
398 isotope probing incubations of methane seep sediments recovered from a Costa Rica methane  
399 seep. These nitrogen-poor sediment incubations were amended with unlabeled methane and  
400  $^{15}\text{N}_2$  and maintained in the laboratory at 10°C under conditions supporting active sulfate-coupled  
401 AOM (see Supplemental Materials and Methods). Sediments with abundant ANME-SRB  
402 consortia were sampled after 9 months of incubation and separated consortia were analyzed by  
403 nanoSIMS to measure single cell  $^{15}\text{N}$  enrichment associated with diazotrophy within ANME-  
404 2b—SEEP-SRB1g consortia. Representative ANME-2b—SEEP-SRB1g consortia ( $n = 4$ ) were  
405 analyzed by FISH-nanoSIMS and shown to be significantly enriched in  $^{15}\text{N}$  relative to natural  
406 abundance values (0.36%; Fig. 8). Among the consortia analyzed, the  $^{15}\text{N}$  fractional abundance  
407 in ANME-2b cells were often higher than that measured in SEEP-SRB1g, with ANME-2b cells  
408 on the exterior of an exceptionally large consortium (Fig. 8b-c) featuring  $^{15}\text{N}$  fractional



### *Correlation analysis reveals new AOM partnerships*

409 abundance of  $1.73\% \pm 0.14$  (number of ROIs,  $n = 72$ ), significantly enriched relative to that  
410 measured in SEEP-SRB1g cells in the exterior,  $0.77\% \pm 0.09$  ( $n = 58$ ). This indicated that  
411 ANME-2b were often the primary diazotroph in consortia, consistent with previous reports from  
412 ANME-2–DSS consortia [8–11]. Notably, however, in one ANME-2b—SEEP-SRB1g  
413 consortium, the SEEP-SRB1g cells were more enriched in  $^{15}\text{N}$  relative to the associated ANME-  
414 2b cells, with ANME-2b cells containing  $1.34\% \pm 0.13$   $^{15}\text{N}$  ( $n = 82$ ) and SEEP-SRB1g containing  
415  $3.02\% \pm 0.20$   $^{15}\text{N}$  ( $n = 22$ , Fig. 8i), suggesting that under certain circumstances the sulfate-  
416 reducing partner may serve as the primary diazotroph. This pattern suggests diazotrophic  
417 flexibility in ANME-2b—SEEP-SRB1g consortia in which one partner—ANME-2b or SEEP-  
418 SRB1g—can serve as the primary diazotroph in the consortium. Additionally, a gradient in  $^{15}\text{N}$   
419 enrichment in a the large ANME-2b consortium was observed in which clusters of ANME-2b  
420 cells associated with the interior of the consortia were significantly more enriched in  $^{15}\text{N}$  relative  
421 to ANME-2b clusters near the aggregate exterior, with  $^{15}\text{N}$  fractional abundances for ANME-2b  
422 cells in the exterior of  $1.73\% \pm 0.14$  ( $n = 72$ ), significantly higher than those measured for  
423 ANME-2b cells in the interior,  $2.64\% \pm 0.14$  ( $n = 116$ ). Notably, no equivalent gradient was  
424 observed in the SEEP-SRB1g partner, with SEEP-SRB1g cells in the exterior displaying  $^{15}\text{N}$   
425 fractional abundances of  $0.77\% \pm 0.09$  ( $n = 58$ ) compared with those measured on the interior,  
426  $0.78\% \pm 0.09$  ( $n = 62$ ).

427

### 428 Discussion

429 The symbiotic relationship between ANME and associated SRB, originally described by Hinrichs  
430 [17], Boetius [4], and Orphan [21], has been the focus of extensive study using FISH [5, 7, 13,  
431 15, 25, 26, 29, 34, 35], magneto-FISH [29, 37, 38], and BONCAT-FACS [39], techniques that  
432 have provided insight into the diversity of partnerships between ANME and SRB. While these  
433 fluorescence-based approaches offer direct confirmation of physical association between taxa

*Correlation analysis reveals new AOM partnerships*

434 and are thus useful for characterizing partnership specificity, they are often constrained by  
435 sample size and are comparatively lower-throughput than sequencing-based approaches. Next-  
436 generation Illumina iTag sequencing of 16S rRNA amplicon sequences offers advantages in  
437 terms of throughput and is rapidly becoming a standard approach in molecular microbial  
438 ecology studies. Correlation analysis performed on these large iTag datasets can be an  
439 effective hypothesis-generating tool for identifying microbial interactions and symbioses in the  
440 environment [75], but most studies employing this approach stop short of validating predictions.  
441 As correlation analysis of iTag datasets is known to be sensitive to false positives due to the  
442 compositional nature of 16S rRNA amplicon libraries [41, 42, 82], specific correlations predicted  
443 between taxa should be corroborated when possible by independent approaches.

444  
445 In this study, we used correlation analysis of 16S rRNA iTag data from 310 methane seep  
446 sediment and carbonate samples on the Costa Rican Margin to identify well-supported (pseudo-  
447  $p$ -values < 0.01) positive correlations between specific OTUs commonly observed in seep  
448 ecosystems. Our analysis identified strong correlations between syntrophic partners previously  
449 described in the literature, such as that between members of the SEEP-SRB1a and ANME-  
450 2a/ANME-2c clades and between ANME-1 and SEEP-SRB2 [5, 7, 13, 15, 25, 26, 29, 34, 35],  
451 and uncovered previously unrecognized relationships between members of the ANME-2b clade  
452 and OTUs affiliated with an uncultured Desulfobacterales lineage, SEEP-SRB1g (Figs. 1-3). We  
453 then validated the specificity of the ANME-2b and SEEP-SRB1g association by FISH (Fig. 4).

454  
455 The specificity of the association between ANME-2b and SEEP-SRB1g appeared to extend  
456 beyond Costa Rica methane seeps and is likely a widespread phenomenon, as this association  
457 was also recovered from BONCAT-FACS datasets originating from methane seep sites off of  
458 Oregon, USA (Hydrate Ridge) and from the Santa Monica Basin, California, USA. Our  
459 observations of ANME-2b—SEEP-SRB1g partnership specificity in numerous samples is

*Correlation analysis reveals new AOM partnerships*

460 consistent with published observations of other ANME-SRB partnerships, where consortia  
461 composed of specific ANME and SRB clades have been observed in seep ecosystems  
462 worldwide [15]. Notably, the syntrophic relationship between ANME-2b and SEEP-SRB1g  
463 appears to be highly specific (Fig. 2), as FISH observations from sediment samples from  
464 multiple Costa Rica methane seep sites (Supp. Table 1) did not show ANME-2b in consortia  
465 with other bacteria besides the SEEP-SRB1g (Fig. 4). This is in contrast with SEEP-SRB1a  
466 which, in these same experiments, was found to form associations with both ANME-2a and  
467 ANME-2c, indicative of this SRB syntroph having a broader capacity for establishing  
468 associations with methanotrophic ANME. Members of the diverse ANME-2c lineage also  
469 appeared to display partnership promiscuity in our network analysis, with positive correlations  
470 observed between ANME-2c OTUs and both SEEP-SRB1a and SEEP-SRB2 OTUs (Fig. 2).  
471 This predicted partnership flexibility in the network analysis was again corroborated by FISH  
472 observations of ANME-2c—SEEP-SRB1a consortia (Fig. 4) and prior reports of ANME-2c in  
473 association with SEEP-SRB2 from Guaymas Basin sediments [13]. These collective data  
474 suggest that partnership specificity varies among different clades of ANME and SRB, which may  
475 be the result of physiological differences and/or molecular compatibility, signal exchange, and  
476 recognition among distinct ANME and SRB that shape the degree of specificity between  
477 particular ANME and SRB partners, as has been observed in other symbiotic associations [83–  
478 85]. The degree of promiscuity or specificity for a given syntrophic partner may be influenced by  
479 the co-evolutionary history of each partnership, with some ANME or SRB physiologies requiring  
480 obligate association with specific partners. A more detailed examination of the genomes of  
481 ANME-2b and SEEP-SRB1g alongside targeted ecophysiological studies may provide clues to  
482 the underlying mechanism(s) driving specificity within this ANME-SRB consortia. Comparative  
483 investigations with ANME-2a and -2c subgroups may similarly uncover strategies enabling  
484 broader partner association, perhaps with preference for a SRB partner shaped by  
485 environmental variables rather than through pre-existing co-evolutionary relationships.

## Correlation analysis reveals new AOM partnerships

486  
487 An initial genomic screening of SEEP-SRB1g offered some insight into the distinct metabolic  
488 capabilities of the SRB partner which may contribute to the association with ANME-2b. The  
489 observation of a complete nitrogenase operon in 3 different SEEP-SRB1g genome bins  
490 suggested the potential for nitrogen fixation, a phenotype not previously described for ANME-  
491 associated SRB (Fig. 5). While previous work on nitrogen utilization by ANME-SRB consortia  
492 has focused on diazotrophy performed by ANME-2 [8–10], environmental surveys of seep  
493 sediments have noted active expression of nitrogenase typically associated with  
494 Deltaproteobacteria [8, 86]. In these studies, the specific microorganisms associated with the  
495 expressed nitrogenase in methane seep sediments were not identified. Prior to our findings  
496 presented here, diazotrophy by ANME-associated SRB had not been demonstrated. A  
497 phylogenetic comparison of the *nifH* sequences associated with SEEP-SRB1g with sequences  
498 of the expressed deltaproteobacterial-affiliated (i.e. Group III) *nifH* transcripts reported in Dekas,  
499 et al. [8] revealed a high degree of sequence similarity, with SEEP-SRB1g related *nifH* among  
500 the most highly expressed (Figs. 5-6). Explicit tests for nitrogenase expression using HCR-FISH  
501 and active diazotrophy using stable isotope probing and FISH-nanoSIMS confirmed the  
502 involvement of SEEP-SRB1g in nitrogen fixation. Of the 4 ANME-2b—SEEP-SRB1g consortia  
503 analyzed by FISH-nanoSIMS, one had significantly more <sup>15</sup>N enrichment in the SEEP-SRB1g  
504 partner relative to the ANME-2b, while the other 3 displayed higher cellular <sup>15</sup>N enrichment in  
505 the ANME-2b partner (Fig. 8). This pattern supported our inference of diazotrophic flexibility  
506 within ANME-2b—SEEP-SRB1g consortia in which either the ANME or the SRB partner can  
507 serve as the primary diazotroph in the consortium. Additionally, our detection of nitrogenase  
508 operons in the reconstructed genomes of the dominant syntrophic SRB partner, SEEP-SRB1a  
509 (Supp. Fig. 6), suggests the potential for nitrogen fixation may extend to other bacterial partners  
510 as well and merits further investigation. Re-examination of nitrogen fixation in these  
511 partnerships with new FISH probes and nanoSIMS at single-cell resolution will further illuminate

### Correlation analysis reveals new AOM partnerships

512 the full diversity of diazotrophic activity among ANME-SRB consortia and the associated  
513 environmental/ physiological controls.  
514  
515 The factors responsible for determining which partner becomes the primary diazotroph in  
516 ANME-2b—SEEP-SRB1g consortia requires targeted study, but our preliminary data suggest  
517 this may be influenced in part by the relative position of ANME-2b or SEEP-SRB1g cells,  
518 particularly within large (>50  $\mu\text{m}$ ) ANME-2b—SEEP-SRB1g consortia. Previous studies of  
519 nitrogen fixation in ANME-SRB consortia found no correlation between consortia size and  
520 diazotrophic activity in consortia with diameters < 10  $\mu\text{m}$  [10], but larger consortia such as those  
521 presented here have not been examined at single-cell resolution. Additionally, consortia with the  
522 morphology observed here, in which ANME-2b cells form multiple sarcinal clusters surrounded  
523 by SEEP-SRB1g (Figs. 4b, 8), have not been the specific focus of nanoSIMS analysis but  
524 appear to be the common morphotype among ANME-2b—SEEP-SRB1g consortia [31]. The  
525 frequency with which this morphotype is observed in ANME-2b—SEEP-SRB1g consortia may  
526 be related to the underlying physiology of this specific partnership. NanoSIMS analysis of a  
527 particularly large ANME-2b—SEEP-SRB1g consortium (~200  $\mu\text{m}$ ) with this characteristic  
528 morphology (Fig. 8a-f) revealed a gradient in diazotrophic activity in which ANME-2b cells  
529 located in the interior of the consortium incorporated far more  $^{15}\text{N}$  from  $^{15}\text{N}_2$  than ANME-2b cells  
530 near the exterior. This pattern may be related to variations in nitrogen supply from the external  
531 environment, as similar patterns of nutrient depletion with increasing depth into microbial  
532 aggregates have been predicted in modeling studies of nitrate uptake in *Trichodesmium* sp. [87]  
533 and directly observed by SIMS in stable isotope probing studies of carbon fixation in biofilm-  
534 forming filamentous cyanobacteria [88]. In these examples, modeling and experimental results  
535 document declining nitrate or bicarbonate ion availability inwards toward the center of the  
536 aggregates resulting from nitrate or bicarbonate consumption. An analogous process may occur  
537 in large ANME-2b—SEEP-SRB1g consortia, where cells situated closer to the exterior of the

*Correlation analysis reveals new AOM partnerships*

538 consortium assimilate environmental  $\text{NH}_4^+$ , increasing nitrogen limitation for cells within the  
539 consortium core. Interestingly, the single consortium in which the SEEP-SRB1g partner was the  
540 inferred primary diazotroph featured SEEP-SRB1g cells in the core of this consortium with  
541 ANME-2b cells toward the exterior (Fig. 8). The current nanoSIMS dataset is small and  
542 determining the biotic and environmental factors that influence which partner serves as the  
543 primary diazotroph in ANME-2b—SEEP-SRB1g consortia necessitates further study, but a  
544 reasonable hypothesis is that the proximity of cells in a given ANME-2b—SEEP-SRB1g  
545 consortium relative to the consortium exterior (and  $\text{NH}_4^+$  availability in the surrounding pore  
546 fluid) influences the spatial patterns of diazotrophic activity by both ANME and SRB in large  
547 consortia. The concentration of ammonium in seep porefluids can be highly variable over  
548 relatively small spatial scales (e.g. between 50 - 300  $\mu\text{M}$  [80]), and rates of diazotrophy  
549 estimated from laboratory incubations of methane seep sediment samples indicate different  
550 threshold concentrations of  $\text{NH}_4^+_{(\text{aq})}$  above which diazotrophy ceases, as low as 25  $\mu\text{M}$  [89] to  
551 100-1000  $\mu\text{M}$  [90–92]. In the large consortia observed here, this threshold [ $\text{NH}_4^+_{(\text{aq})}$ ] may be  
552 crossed within the consortium as  $\text{NH}_4^+$  is assimilated by cells at the consortium exterior,  
553 inducing nitrogen limitation and diazotrophy by ANME or SRB near the consortium core. Given  
554 the importance of diazotrophy in ANME-SRB consortia for nitrogen cycling at methane seep  
555 communities [10, 89], future work should test this hypothesis with SIP incubations with  $^{15}\text{N}_2$   
556 under variable [ $\text{NH}_4^+_{(\text{aq})}$ ].

557  
558 The observed variation in diazotrophic activity in ANME-2b or SEEP-SRB1g cells may also be  
559 the result of phenotypic heterogeneity [93] within the multicellular ANME-2b—SEEP-SRB1g  
560 consortia, in which expression of the nitrogenase operon that ANME-2b and SEEP-SRB1g  
561 partners both possess is an emergent behavior resulting from the spatial organization of ANME-  
562 2b and SEEP-SRB1g cells within the consortium. On the basis of nanoSIMS observations of  
563 heterogeneous diazotrophy in clonal *Klebsiella oxytoca* cultures, phenotypic heterogeneity was

*Correlation analysis reveals new AOM partnerships*

564 inferred to confer selective advantage on microbial communities by enabling rapid response to  
565 environmental fluctuations [94]. Similar heterogeneity in *nif* expression by ANME-2b or SEEP-  
566 SRB1g cells may provide partners with resilience against changes in environmental nitrogen  
567 supply. Corroborating these observations in diverse ANME-SRB consortia and direct coupling of  
568 single-cell mRNA expression with nanoSIMS-acquired  $^{15}\text{N}$  enrichment would further inform the  
569 degree to which relative arrangement of the partners and spatial structure within a consortium  
570 plays a significant role in determining the mode of nutrient or electron transfer between partners.

## Correlation analysis reveals new AOM partnerships

### 571 Conclusions

572 Here, we present an effective approach to detect novel pairings of microbial symbionts by  
573 coupling correlation analysis of 16S rRNA amplicon libraries with FISH and BONCAT-FACS  
574 experiments, going beyond amplicon sequencing-based hypothesis generation to experimental  
575 validation of hypothesized partnerships using microscopy and single-cell sorting techniques.  
576 Correlation analysis performed on a 16S amplicon survey of methane seep sediments near  
577 Costa Rica uncovered a novel and highly-specific ANME-SRB partnership between ANME-2b  
578 and SEEP-SRB1g. This partnership specificity was then validated by FISH, and further  
579 corroborated by 16S rRNA amplicon sequences from BONCAT-FACS-sorted single ANME-SRB  
580 consortia from methane seep sediments near Costa Rica, Hydrate Ridge, and Santa Monica  
581 Basin in California. Preliminary genomic screening of representative genomes from SEEP-  
582 SRB1g uncovered potential for nitrogen fixation in these genomes. Examination of published  
583 *nifH* cDNA clone libraries [8] and transcriptomic data [14] prepared from methane seep  
584 sediments demonstrated that SEEP-SRB1g actively expresses *nifH in vivo*. Co-localization of  
585 signal for *nifH* mRNA and SEEP-SRB1g 16S rRNA by HCR-FISH further corroborated active  
586 transcription of *nifH* by SEEP-SRB1g. FISH-nanoSIMS analysis of ANME-2b—SEEP-SRB1g  
587 consortia grown with  $^{15}\text{N}_2$  headspace documented  $^{15}\text{N}$  incorporation in SEEP-SRB1g cells,  
588 suggesting that SEEP-SRB1g may fix nitrogen as well. Future work should focus on examining  
589 unique aspects of each ANME-SRB partnership to improve our understanding of the diversity of  
590 anaerobic methane oxidation symbioses endowed by evolution.



## Correlation analysis reveals new AOM partnerships

### 591 Acknowledgements

592 The authors would like to acknowledge the ROC-HITS science party, R/V *Atlantis* crew and  
593 HOV *Alvin* pilots from AT37-13. We would like to thank G. Chadwick for helpful comments and  
594 H. Yu for assistance with sediment incubations. We additionally acknowledge Y. Guan for his  
595 assistance with the nanoSIMS analysis, R. Hatzenpichler for early BONCAT-FACS  
596 experiments, and M. Aoki (National Institute of Technology, Wakayama College, Japan) for  
597 design of the FISH probe ANME-2a-828. We would further like to thank M. Schwarzkopf and  
598 Molecular Technologies for designing a set of HCR-FISH probes for *nifH* mRNA. Funding for  
599 this work was provided by the US Department of Energy's Office of Science (DE-SC0020373),  
600 the National Science Foundation BIO-OCE grant (#1634002) and the NSF-supported Center for  
601 Dark Energy Biosphere Investigations, and a Gordon and Betty Moore Foundation Marine  
602 Microbiology Investigator grant (#3780); (all to V.J.O.). A portion of this research was performed  
603 under the Facilities Integrating Collaborations for User Science (FICUS) initiative and used  
604 resources at the DOE Joint Genome Institute and the Environmental Molecular Sciences  
605 Laboratory, which are DOE Office of Science User Facilities. Both facilities are sponsored by  
606 the Office of Biological and Environmental Research and operated under Contract Nos. DE-  
607 AC02-05CH11231 (JGI) and DE-AC05-76RL01830 (EMSL). K.S.M. was supported in part by a  
608 National Science Foundation Graduate Research Fellowship and a Schlanger Ocean Drilling  
609 Fellowship. V.J.O. is a CIFAR Fellow in the Earth 4D: Subsurface Science and Exploration  
610 Program.

611

### 612 Competing Interests

613 The authors declare no competing interests.

*Correlation analysis reveals new AOM partnerships*

614 **References**

- 615 1. Knittel K, Boetius A. Anaerobic Oxidation of Methane: Progress with an Unknown Process.  
616 *Annu Rev Microbiol* 2009; 63: 311–334.
- 617 2. Reeburgh WS. Oceanic Methane Biogeochemistry. *Chem Rev* 2007; 107: 486–513.
- 618 3. Orphan VJ, House CH, Hinrichs K-U, McKeegan KD, DeLong EF. Methane-Consuming  
619 Archaea Revealed by Directly Coupled Isotopic and Phylogenetic Analysis. *Science* 2001;  
620 293: 484–487.
- 621 4. Boetius A, Ravensschlag K, Schubert CJ, Rickert D, Widdel F, Gieseke A, et al. A marine  
622 microbial consortium apparently mediating anaerobic oxidation of methane. *Nature* 2000;  
623 407: 623.
- 624 5. McGlynn SE, Chadwick GL, Kempes CP, Orphan VJ. Single cell activity reveals direct  
625 electron transfer in methanotrophic consortia. *Nature* 2015; 526: 531–535.
- 626 6. Scheller S, Yu H, Chadwick GL, McGlynn SE, Orphan VJ. Artificial electron acceptors  
627 decouple archaeal methane oxidation from sulfate reduction. *Science* 2016; 351: 703–707.
- 628 7. Wegener G, Krukenberg V, Riedel D, Tegetmeyer HE, Boetius A. Intercellular wiring enables  
629 electron transfer between methanotrophic archaea and bacteria. *Nature* 2015; 526: 587–  
630 590.
- 631 8. Dekas AE, Connon SA, Chadwick GL, Trembath-Reichert E, Orphan VJ. Activity and  
632 interactions of methane seep microorganisms assessed by parallel transcription and FISH-  
633 NanoSIMS analyses. *ISME J* 2016; 10: 678–692.
- 634 9. Dekas AE, Poretsky RS, Orphan VJ. Deep-Sea Archaea Fix and Share Nitrogen in Methane-  
635 Consuming Microbial Consortia. *Science* 2009; 326: 422–426.
- 636 10. Dekas AE, Chadwick GL, Bowles MW, Joye SB, Orphan VJ. Spatial distribution of nitrogen  
637 fixation in methane seep sediment and the role of the ANME archaea. *Environ Microbiol*  
638 2014; 16: 3012–3029.

*Correlation analysis reveals new AOM partnerships*

- 639 11. Orphan VJ, Turk KA, Green AM, House CH. Patterns of 15N assimilation and growth of  
640 methanotrophic ANME-2 archaea and sulfate-reducing bacteria within structured syntrophic  
641 consortia revealed by FISH-SIMS. *Environ Microbiol* 2009; 11: 1777–1791.
- 642 12. Evans PN, Boyd JA, Leu AO, Woodcroft BJ, Parks DH, Hugenholtz P, et al. An evolving  
643 view of methane metabolism in the Archaea. *Nat Rev Microbiol* 2019; 17: 219–232.
- 644 13. Krukenberg V, Riedel D, Gruber-Vodicka HR, Buttigieg PL, Tegetmeyer HE, Boetius A, et  
645 al. Gene expression and ultrastructure of meso- and thermophilic methanotrophic consortia.  
646 *Environ Microbiol* 2018; 20: 1651–1666.
- 647 14. Skennerton CT, Chourey K, Iyer R, Hettich RL, Tyson GW, Orphan VJ. Methane-Fueled  
648 Syntrophy through Extracellular Electron Transfer: Uncovering the Genomic Traits  
649 Conserved within Diverse Bacterial Partners of Anaerobic Methanotrophic Archaea. *mBio*  
650 2017; 8: e00530-17.
- 651 15. Schreiber L, Holler T, Knittel K, Meyerdierks A, Amann R. Identification of the dominant  
652 sulfate-reducing bacterial partner of anaerobic methanotrophs of the ANME-2 clade.  
653 *Environ Microbiol* 2010; 12: 2327–2340.
- 654 16. Green-Saxena A, Dekas AE, Dalleska NF, Orphan VJ. Nitrate-based niche differentiation by  
655 distinct sulfate-reducing bacteria involved in the anaerobic oxidation of methane. *ISME J*  
656 2014; 8: 150–163.
- 657 17. Hinrichs K-U, Hayes JM, Sylva SP, Brewer PG, DeLong EF. Methane-consuming  
658 archaeobacteria in marine sediments. *Nature* 1999; 398: 802.
- 659 18. Hallam SJ, Girguis PR, Preston CM, Richardson PM, DeLong EF. Identification of Methyl  
660 Coenzyme M Reductase A (*mcrA*) Genes Associated with Methane-Oxidizing Archaea. *Appl*  
661 *Environ Microbiol* 2003; 69: 5483–5491.
- 662 19. Michaelis W, Seifert R, Nauhaus K, Treude T, Thiel V, Blumenberg M, et al. Microbial Reefs  
663 in the Black Sea Fueled by Anaerobic Oxidation of Methane. *Science* 2002; 297: 1013–  
664 1015.

*Correlation analysis reveals new AOM partnerships*

- 665 20. Knittel K, Lösekann T, Boetius A, Kort R, Amann R. Diversity and Distribution of  
666 Methanotrophic Archaea at Cold Seeps. *Appl Environ Microbiol* 2005; 71: 467–479.
- 667 21. Orphan VJ, Hinrichs K-U, Ussler W, Paull CK, Taylor LT, Sylva SP, et al. Comparative  
668 Analysis of Methane-Oxidizing Archaea and Sulfate-Reducing Bacteria in Anoxic Marine  
669 Sediments. *Appl Environ Microbiol* 2001; 67: 1922–1934.
- 670 22. Orphan VJ, House CH, Hinrichs K-U, McKeegan KD, DeLong EF. Multiple archaeal groups  
671 mediate methane oxidation in anoxic cold seep sediments. *Proc Natl Acad Sci* 2002; 99:  
672 7663–7668.
- 673 23. Raghoebarsing AA, Pol A, Pas-Schoonen KT van de, Smolders AJP, Ettwig KF, Rijpstra  
674 WIC, et al. A microbial consortium couples anaerobic methane oxidation to denitrification.  
675 *Nature* 2006; 440: 918.
- 676 24. Haroon MF, Hu S, Shi Y, Imelfort M, Keller J, Hugenholtz P, et al. Anaerobic oxidation of  
677 methane coupled to nitrate reduction in a novel archaeal lineage. *Nature* 2013; 500: 567–  
678 570.
- 679 25. Niemann H, Lösekann T, Beer D de, Elvert M, Nadalig T, Knittel K, et al. Novel microbial  
680 communities of the Haakon Mosby mud volcano and their role as a methane sink. *Nature*  
681 2006; 443: 854.
- 682 26. Lösekann T, Knittel K, Nadalig T, Fuchs B, Niemann H, Boetius A, et al. Diversity and  
683 Abundance of Aerobic and Anaerobic Methane Oxidizers at the Haakon Mosby Mud  
684 Volcano, Barents Sea. *Appl Environ Microbiol* 2007; 73: 3348–3362.
- 685 27. Manz W, Eisenbrecher M, Neu TR, Szewzyk U. Abundance and spatial organization of  
686 Gram-negative sulfate-reducing bacteria in activated sludge investigated by in situ probing  
687 with specific 16S rRNA targeted oligonucleotides. *FEMS Microbiol Ecol* 1998; 25: 43–61.
- 688 28. Nauhaus K, Albrecht M, Elvert M, Boetius A, Widdel F. In vitro cell growth of marine  
689 archaeal-bacterial consortia during anaerobic oxidation of methane with sulfate. *Environ*  
690 *Microbiol* 2007; 9: 187–196.

*Correlation analysis reveals new AOM partnerships*

- 691 29. Pernthaler A, Dekas AE, Brown CT, Goffredi SK, Embaye T, Orphan VJ. Diverse syntrophic  
692 partnerships from deep-sea methane vents revealed by direct cell capture and  
693 metagenomics. *Proc Natl Acad Sci U S A* 2008; 105: 7052–7057.
- 694 30. Vigneron A, Cruaud P, Pignet P, Caprais J-C, Cambon-Bonavita M-A, Godfroy A, et al.  
695 Archaeal and anaerobic methane oxidizer communities in the Sonora Margin cold seeps,  
696 Guaymas Basin (Gulf of California). *ISME J* 2013; 7: 1595–1608.
- 697 31. McGlynn SE, Chadwick GL, O'Neill A, Mackey M, Thor A, Deerinck TJ, et al. Subgroup  
698 Characteristics of Marine Methane-Oxidizing ANME-2 Archaea and Their Syntrophic  
699 Partners as Revealed by Integrated Multimodal Analytical Microscopy. *Appl Environ*  
700 *Microbiol* 2018; 84: e00399-18.
- 701 32. Treude T, Krüger M, Boetius A, Jørgensen BB. Environmental control on anaerobic  
702 oxidation of methane in the gassy sediments of Eckernförde Bay (German Baltic). *Limnol*  
703 *Oceanogr* 2005; 50: 1771–1786.
- 704 33. Girguis PR, Orphan VJ, Hallam SJ, DeLong EF. Growth and Methane Oxidation Rates of  
705 Anaerobic Methanotrophic Archaea in a Continuous-Flow Bioreactor. *Appl Environ Microbiol*  
706 2003; 69: 5472–5482.
- 707 34. Kleindienst S, Ramette A, Amann R, Knittel K. Distribution and in situ abundance of sulfate-  
708 reducing bacteria in diverse marine hydrocarbon seep sediments. *Environ Microbiol* 2012;  
709 14: 2689–2710.
- 710 35. Holler T, Widdel F, Knittel K, Amann R, Kellermann MY, Hinrichs K-U, et al. Thermophilic  
711 anaerobic oxidation of methane by marine microbial consortia. *ISME J* 2011; 5: 1946–1956.
- 712 36. Loy A, Lehner A, Lee N, Adamczyk J, Meier H, Ernst J, et al. Oligonucleotide Microarray for  
713 16S rRNA Gene-Based Detection of All Recognized Lineages of Sulfate-Reducing  
714 Prokaryotes in the Environment. *Appl Environ Microbiol* 2002; 68: 5064–5081.
- 715 37. Trembath-Reichert E, Case DH, Orphan VJ. Characterization of microbial associations with  
716 methanotrophic archaea and sulfate-reducing bacteria through statistical comparison of

*Correlation analysis reveals new AOM partnerships*

- 717        nested Magneto-FISH enrichments. *PeerJ* 2016; 4: e1913.
- 718    38. Trembath-Reichert E, Green-Saxena A, Orphan VJ. Chapter Two - Whole Cell  
719        Immunomagnetic Enrichment of Environmental Microbial Consortia Using rRNA-Targeted  
720        Magneto-FISH. In: DeLong EF (ed). *Methods in Enzymology*. 2013. Academic Press, pp  
721        21–44.
- 722    39. Hatzenpichler R, Connon SA, Goudeau D, Malmstrom RR, Woyke T, Orphan VJ. Visualizing  
723        in situ translational activity for identifying and sorting slow-growing archaeal–bacterial  
724        consortia. *Proc Natl Acad Sci* 2016; 113: E4069–E4078.
- 725    40. Degnan PH, Ochman H. Illumina-based analysis of microbial community diversity. *ISME J*  
726        2012; 6: 183–194.
- 727    41. Friedman J, Alm EJ. Inferring Correlation Networks from Genomic Survey Data. *PLOS*  
728        *Comput Biol* 2012; 8: e1002687.
- 729    42. Kurtz ZD, Müller CL, Miraldi ER, Littman DR, Blaser MJ, Bonneau RA. Sparse and  
730        Compositionally Robust Inference of Microbial Ecological Networks. *PLOS Comput Biol*  
731        2015; 11: e1004226.
- 732    43. Schwager E, Mallick H, Venz S, Huttenhower C. A Bayesian method for detecting pairwise  
733        associations in compositional data. *PLOS Comput Biol* 2017; 13: e1005852.
- 734    44. Lima-Mendez G, Faust K, Henry N, Decelle J, Colin S, Carcillo F, et al. Determinants of  
735        community structure in the global plankton interactome. *Science* 2015; 348.
- 736    45. Bohrmann G, Heeschen K, Jung C, Weinrebe W, Baranov B, Cailleau B, et al. Widespread  
737        fluid expulsion along the seafloor of the Costa Rica convergent margin. *Terra Nova* 2002;  
738        14: 69–79.
- 739    46. Mau S, Sahling H, Rehder G, Suess E, Linke P, Soeding E. Estimates of methane output  
740        from mud extrusions at the erosive convergent margin off Costa Rica. *Mar Geol* 2006; 225:  
741        129–144.
- 742    47. Sahling H, Masson DG, Ranero CR, Hühnerbach V, Weinrebe W, Klauke I, et al. Fluid

*Correlation analysis reveals new AOM partnerships*

- 743 seepage at the continental margin offshore Costa Rica and southern Nicaragua. *Geochem*  
744 *Geophys Geosystems* 2008; 9.
- 745 48. Glass JB, Yu H, Steele JA, Dawson KS, Sun S, Chourey K, et al. Geochemical,  
746 metagenomic and metaproteomic insights into trace metal utilization by methane-oxidizing  
747 microbial consortia in sulphidic marine sediments. *Environ Microbiol* 2014; 16: 1592–1611.
- 748 49. Case DH, Pasulka AL, Marlow JJ, Grupe BM, Levin LA, Orphan VJ. Methane Seep  
749 Carbonates Host Distinct, Diverse, and Dynamic Microbial Assemblages. *mBio* 2015; 6.
- 750 50. Parada AE, Needham DM, Fuhrman JA. Every base matters: assessing small subunit rRNA  
751 primers for marine microbiomes with mock communities, time series and global field  
752 samples. *Environ Microbiol* 2016; 18: 1403–1414.
- 753 51. Caporaso JG, Kuczynski J, Stombaugh J, Bittinger K, Bushman FD, Costello EK, et al.  
754 QIIME allows analysis of high-throughput community sequencing data. *Nat Methods* 2010;  
755 7: 335–336.
- 756 52. Mason OU, Case DH, Naehr TH, Lee RW, Thomas RB, Bailey JV, et al. Comparison of  
757 Archaeal and Bacterial Diversity in Methane Seep Carbonate Nodules and Host Sediments,  
758 Eel River Basin and Hydrate Ridge, USA. *Microb Ecol* 2015; 70: 766–784.
- 759 53. Edgar RC. Search and clustering orders of magnitude faster than BLAST. *Bioinformatics*  
760 2010; 26: 2460–2461.
- 761 54. Quast C, Pruesse E, Yilmaz P, Gerken J, Schweer T, Yarza P, et al. The SILVA ribosomal  
762 RNA gene database project: improved data processing and web-based tools. *Nucleic Acids*  
763 *Res* 2013; 41: D590–D596.
- 764 55. Stamatakis A. RAxML version 8: a tool for phylogenetic analysis and post-analysis of large  
765 phylogenies. *Bioinformatics* 2014; 30: 1312–1313.
- 766 56. Towns J, Cockerill T, Dahan M, Foster I, Gaither K, Grimshaw A, et al. XSEDE: Accelerating  
767 Scientific Discovery. *Comput Sci Eng* 2014; 16: 62–74.
- 768 57. Miller MA, Pfeiffer W, Schwartz T. Creating the CIPRES Science Gateway for inference of

*Correlation analysis reveals new AOM partnerships*

- 769 large phylogenetic trees. *2010 Gatew. Comput. Environ. Workshop GCE*. 2010. pp 1–8.
- 770 58. Edgar RC. MUSCLE: multiple sequence alignment with high accuracy and high throughput.  
771 *Nucleic Acids Res* 2004; 32: 1792–1797.
- 772 59. Eren AM, Esen ÖC, Quince C, Vineis JH, Morrison HG, Sogin ML, et al. Anvi'o: an  
773 advanced analysis and visualization platform for 'omics data. *PeerJ* 2015; 3: e1319.
- 774 60. Campbell BJ, Yu L, Heidelberg JF, Kirchman DL. Activity of abundant and rare bacteria in a  
775 coastal ocean. *Proc Natl Acad Sci* 2011; 108: 12776–12781.
- 776 61. Letunic I, Bork P. Interactive Tree Of Life (iTOL) v4: recent updates and new developments.  
777 *Nucleic Acids Res* 2019; 47: W256–W259.
- 778 62. Ludwig W, Strunk O, Westram R, Richter L, Meier H, Yadhukumar, et al. ARB: a software  
779 environment for sequence data. *Nucleic Acids Res* 2004; 32: 1363–1371.
- 780 63. Daims H, Stoecker K, Wagner M, Stoecker K, Wagner M. Fluorescence in situ hybridization  
781 for the detection of prokaryotes. *Molecular Microbial Ecology*.  
782 <https://www.taylorfrancis.com/>. Accessed 15 Jul 2019.
- 783 64. Glöckner FO, Fuchs BM, Amann R. Bacterioplankton Compositions of Lakes and Oceans: a  
784 First Comparison Based on Fluorescence In Situ Hybridization. *Appl Environ Microbiol*  
785 1999; 65: 3721–3726.
- 786 65. Dirks RM, Pierce NA. Triggered amplification by hybridization chain reaction. *Proc Natl Acad*  
787 *Sci* 2004; 101: 15275–15278.
- 788 66. Choi HMT, Beck VA, Pierce NA. Next-Generation in Situ Hybridization Chain Reaction:  
789 Higher Gain, Lower Cost, Greater Durability. *ACS Nano* 2014; 8: 4284–4294.
- 790 67. Yamaguchi T, Kawakami S, Hatamoto M, Imachi H, Takahashi M, Araki N, et al. In situ  
791 DNA-hybridization chain reaction (HCR): a facilitated in situ HCR system for the detection of  
792 environmental microorganisms. *Environ Microbiol* 2015; 17: 2532–2541.
- 793 68. Choi HMT, Schwarzkopf M, Fornace ME, Acharya A, Artavanis G, Stegmaier J, et al. Third-  
794 generation in situ hybridization chain reaction: multiplexed, quantitative, sensitive, versatile,



*Correlation analysis reveals new AOM partnerships*

- 795 robust. *Development* 2018; 145.
- 796 69. Cline JD. Spectrophotometric Determination of Hydrogen Sulfide in Natural Waters1. *Limnol*  
797 *Oceanogr* 1969; 14: 454–458.
- 798 70. Dekas AE, Orphan VJ. Chapter Twelve - Identification of Diazotrophic Microorganisms in  
799 Marine Sediment via Fluorescence In Situ Hybridization Coupled to Nanoscale Secondary  
800 Ion Mass Spectrometry (FISH-NanoSIMS). In: Klotz MG (ed). *Methods in Enzymology*.  
801 2011. Academic Press, pp 281–305.
- 802 71. Polerecky L, Adam B, Milucka J, Musat N, Vagner T, Kuypers MMM. Look@NanoSIMS--a  
803 tool for the analysis of nanoSIMS data in environmental microbiology. *Environ Microbiol*  
804 2012; 14: 1009–1023.
- 805 72. Berry D, Widder S. Deciphering microbial interactions and detecting keystone species with  
806 co-occurrence networks. *Front Microbiol* 2014; 5.
- 807 73. David LA, Maurice CF, Carmody RN, Gootenberg DB, Button JE, Wolfe BE, et al. Diet  
808 rapidly and reproducibly alters the human gut microbiome. *Nature* 2014; 505: 559–563.
- 809 74. Leone V, Gibbons SM, Martinez K, Hutchison AL, Huang EY, Cham CM, et al. Effects of  
810 Diurnal Variation of Gut Microbes and High-Fat Feeding on Host Circadian Clock Function  
811 and Metabolism. *Cell Host Microbe* 2015; 17: 681–689.
- 812 75. Ruff SE, Biddle JF, Teske AP, Knittel K, Boetius A, Ramette A. Global dispersion and local  
813 diversification of the methane seep microbiome. *Proc Natl Acad Sci* 2015; 112: 4015–4020.
- 814 76. Fruchterman TMJ, Reingold EM. Graph drawing by force-directed placement. *Softw Pract*  
815 *Exp* 1991; 21: 1129–1164.
- 816 77. Moody J, White DR. Structural Cohesion and Embeddedness: A Hierarchical Concept of  
817 Social Groups. *Am Sociol Rev* 2003; 68: 103–127.
- 818 78. Gu Z, Gu L, Eils R, Schlesner M, Brors B. Circlize implements and enhances circular  
819 visualization in R. *Bioinformatics* 2014; 30: 2811–2812.
- 820 79. Nikolakakis K, Lehnert E, McFall-Ngai MJ, Ruby EG. Use of Hybridization Chain Reaction-

*Correlation analysis reveals new AOM partnerships*

- 821       Fluorescent In Situ Hybridization To Track Gene Expression by Both Partners during  
822       Initiation of Symbiosis. *Appl Environ Microbiol* 2015; 81: 4728–4735.
- 823   80. DePas WH, Starwalt-Lee R, Sambeek LV, Kumar SR, Gradinaru V, Newman DK. Exposing  
824       the Three-Dimensional Biogeography and Metabolic States of Pathogens in Cystic Fibrosis  
825       Sputum via Hydrogel Embedding, Clearing, and rRNA Labeling. *mBio* 2016; 7.
- 826   81. Imachi H, Nobu MK, Nakahara N, Morono Y, Ogawara M, Takaki Y, et al. Isolation of an  
827       archaeon at the prokaryote–eukaryote interface. *Nature* 2020; 577: 519–525.
- 828   82. Gloor GB, Macklaim JM, Pawlowsky-Glahn V, Egozcue JJ. Microbiome Datasets Are  
829       Compositional: And This Is Not Optional. *Front Microbiol* 2017; 8.
- 830   83. Sampayo EM, Ridgway T, Bongaerts P, Hoegh-Guldberg O. Bleaching susceptibility and  
831       mortality of corals are determined by fine-scale differences in symbiont type. *Proc Natl Acad*  
832       *Sci* 2008; 105: 10444–10449.
- 833   84. Parkinson JE, Baumgarten S, Michell CT, Baums IB, LaJeunesse TC, Voolstra CR. Gene  
834       Expression Variation Resolves Species and Individual Strains among Coral-Associated  
835       Dinoflagellates within the Genus *Symbiodinium*. *Genome Biol Evol* 2016; 8: 665–680.
- 836   85. Barshis DJ, Ladner JT, Oliver TA, Palumbi SR. Lineage-Specific Transcriptional Profiles of  
837       *Symbiodinium* spp. Unaltered by Heat Stress in a Coral Host. *Mol Biol Evol* 2014; 31: 1343–  
838       1352.
- 839   86. Kapili BJ, Barnett SE, Buckley DH, Dekas AE. Evidence for phylogenetically and  
840       catabolically diverse active diazotrophs in deep-sea sediment. *ISME J* 2020; 14: 971–983.
- 841   87. Klawonn I, Eichner MJ, Wilson ST, Moradi N, Thamdrup B, Kümmel S, et al. Distinct  
842       nitrogen cycling and steep chemical gradients in *Trichodesmium* colonies. *ISME J* 2020; 14:  
843       399–412.
- 844   88. Petroff AP, Wu T-D, Liang B, Mui J, Guerquin-Kern J-L, Vali H, et al. Reaction–diffusion  
845       model of nutrient uptake in a biofilm: Theory and experiment. *J Theor Biol* 2011; 289: 90–  
846       95.

*Correlation analysis reveals new AOM partnerships*

- 847 89. Dekas AE, Fike DA, Chadwick GL, Green □ Saxena A, Fortney J, Connon SA, et al.  
848 Widespread nitrogen fixation in sediments from diverse deep-sea sites of elevated carbon  
849 loading. *Environ Microbiol* 2018; 20: 4281–4296.
- 850 90. Knapp AN. The sensitivity of marine N<sub>2</sub> fixation to dissolved inorganic nitrogen. *Front*  
851 *Microbiol* 2012; 3.
- 852 91. Bertics VJ, Löscher CR, Salonen I, Dale AW, Gier J, Schmitz RA, et al. Occurrence of  
853 benthic microbial nitrogen fixation coupled to sulfate reduction in the seasonally hypoxic  
854 Eckernförde Bay, Baltic Sea. *Biogeosciences* 2013; 10: 1243–1258.
- 855 92. Gier J, Sommer S, Löscher CR, Dale AW, Schmitz RA, Treude T. Nitrogen fixation in  
856 sediments along a depth transect through the Peruvian oxygen minimum zone.  
857 *Biogeosciences* 2016; 13: 4065–4080.
- 858 93. Ackermann M. A functional perspective on phenotypic heterogeneity in microorganisms. *Nat*  
859 *Rev Microbiol* 2015; 13: 497–508.
- 860 94. Schreiber F, Littmann S, Lavik G, Escrig S, Meibom A, Kuypers MMM, et al. Phenotypic  
861 heterogeneity driven by nutrient limitation promotes growth in fluctuating environments. *Nat*  
862 *Microbiol* 2016; 1: 1–7.
- 863 95. Raymond J, Siefert JL, Staples CR, Blankenship RE. The Natural History of Nitrogen  
864 Fixation. *Mol Biol Evol* 2004; 21: 541–554.
- 865

### *Correlation analysis reveals new AOM partnerships*

866 Figure 1. Analysis of SparCC-calculated correlations between 16S iTag amplicon sequences  
867 (OTUs clustered at 99% similarity) from an ecological survey of 310 methane seep sediment  
868 samples from seafloor sites off of Costa Rica. A stacked histogram (A) illustrates the proportion  
869 of correlations deemed significant on the basis of pseudo-*p*-values < 0.01 calculated by  
870 comparison with 100 bootstrapped correlation tables (see Materials and Methods). Of the  
871 correlations with pseudo-*p*-values < 0.01, 18% include ANME with a non-ANME taxon (B).  
872 Significant correlations between OTUs with taxonomy assignments that are identical at the  
873 genus level (e.g. two *Anaerolinea* OTUs) are indicated by identical taxonomy assignment. 32%  
874 of correlations between ANME and non-ANME taxa are represented by OTUs assigned to three  
875 groups of sulfate-reducing bacteria: SEEP-SRB1g, SEEP-SRB1a, and SEEP-SRB2 (C).  
876 Stacked histograms of correlations between OTUs assigned to SEEP-SRB1g, SEEP-SRB1a, or  
877 SEEP-SRB2 and ANME OTUs, parsed by ANME subtype (D), highlights specific associations  
878 predicted between ANME-1 and either SEEP-SRB1a or SEEP-SRB2, ANME-2a and SEEP-  
879 SRB1a, ANME-2c and SEEP-SRB1a, and between ANME-2b and SEEP-SRB1g.

880  
881 Figure 2. Network analysis of the subset of correlations between OTUs calculated by SparCC  
882 [41] that are both significant (*pseudo-p*-values < 0.01, 100 bootstraps) and strong ( $\geq 99^{\text{th}}$   
883 percentile). Correlation strength is proportional to edge length and used to visualize the network  
884 (top panel) using force-directed methods [76]. Edges are black where they belong to a set of  
885 cohesive blocks of nodes [77] and gray otherwise. Chord diagram [78] visualizing ANME-SRB  
886 partnership specificity (bottom panel), with band thickness between SRB (left) and ANME (right)  
887 proportional to the number of edges between ANME and SRB OTUs within cohesive blocks.  
888 Network analysis supports (cf. Fig. 1) previously-undescribed association between ANME-2b  
889 and SEEP-SRB1g.

890 Figure 3. 16S rRNA phylogenetic tree of methane seep Deltaproteobacteria and other lineages,  
891 including sequences from recovered metagenome-assembled genomes (MAGs) [14], iTag

*Correlation analysis reveals new AOM partnerships*

892 amplicons from BONCAT-FACS-sorted ANME-SRB consortia [39], iTag amplicon data from this  
893 study, and previously published clone library sequences. Maximum likelihood phylogeny was  
894 inferred using 100 bootstraps with >70% or 90% bootstrap support of internal nodes indicated  
895 with open or closed circles, respectively. Taxa associated with SRB amplicon iTag sequences  
896 were determined from data in Hatzenpichler, et al. 2016 [39] (BONCAT-FACS-sorted ANME-  
897 SRB consortia), and by network analysis of iTag amplicon data from methane seep samples (cf.  
898 Fig. 2). Taxa in bold represent 16S rRNA sequences from MAG bins acquired from methane  
899 seep sediments [14] or from BONCAT-FACS-sorted ANME-SRB consortia, including associated  
900 iTag amplicons [39]. The SEEP-SRB1a and -1g clades are operationally defined here by the  
901 extent of matches to the respective 16S rRNA FISH probes Seep1a-1441 and Seep1g-1443.  
902 Given the low bootstrap values for divergent sequences, the true extent of the SEEP-SRB1g  
903 clade is unclear, indicated by the dashed line (cf. Supp. Fig. 5).

904  
905 Figure 4. FISH data targeting AOM consortia in seep sediment samples using oligonucleotide  
906 probes targeting ANME-2b (ANME-2b-726) and ANME-2a (ANME-2b-828); (in red), a SEEP-  
907 SRB1a (Seep1a-1443) probe (in green) and a newly-designed probe (Seep1g-1443) targeting  
908 the SEEP-SRB1g clade (in yellow) demonstrating physical association between ANME-2b and  
909 SEEP-SRB1g. DAPI counterstain is shown in blue. Examples of ANME-2b—SEEP-SRB1g (B,  
910 F) and ANME-2a/ANME-2c—SEEP-SRB1a (C, D, G, H) partnership specificity. Seep sediments  
911 harboring ANME-2a and ANME-2b (A-D) host AOM consortia that are composed primarily of  
912 either ANME-2a—SEEP-SRB1a or ANME-2b—SEEP-SRB1g (B, C, D). The absence of  
913 hybridization with the ANME-2b probe in AOM consortia positively hybridized by the SEEP-  
914 SRB1a probe (A) and absence of ANME-2a probe hybridization in SEEP-SRB1g-containing  
915 consortia (D) further supports distinct ANME-2—SRB pairings for ANME-2a and ANME-2b.  
916 Similarly, FISH analysis of AOM consortia from sediments rich in ANME-2c and ANME-2b (E-H)  
917 were composed almost entirely of ANME-2b—SEEP-SRB1g or ANME-2c—SEEP-SRB1a

### Correlation analysis reveals new AOM partnerships

918 partnerships (F, G, H); AOM consortia positively hybridized with the SEEP-SRB1g or SEEP-  
919 SRB1a probes were not observed to hybridize with probes targeting ANME-2c (H) or ANME-2b  
920 (E), respectively. In all panels, the scale bar is 10  $\mu$ m.

921  
922 Figure 5. Genome tree of ANME-associated Deltaproteobacteria and related organisms inferred  
923 from maximum likelihood methods. Bootstrap support for internal nodes was determined using  
924 100 bootstraps and depicted on the tree as open (>70% bootstrap support) or closed (>90%)  
925 circles. Genome bins containing a 16S rRNA gene or an associated 16S iTag amplicon  
926 sequence are highlighted in bold and with a color corresponding to 16S taxonomy assignment.  
927 Inferred taxonomy of genome bins closely related to bins containing 16S rRNA sequences are  
928 highlighted in a lighter shade. Genome bins containing the nitrogenase operon are annotated  
929 with a blue bar. *nifH* sequences found to be expressed in methane seep sediments in cDNA  
930 clone libraries [8] are annotated by “cDNA”. As noted in the text, a search of unpublished SEEP-  
931 SRB1a MAGs revealed the presence of highly-expressed [8] *nifH* sequences in several  
932 unpublished bins (Supp. Fig. 6).

933  
934 Figure 6. Phylogeny of *nifH* sequences extracted from *nifH* cDNA (red text) and DNA clone  
935 libraries [8], from genome bins acquired from methane seep sediments [14], and from other  
936 Deltaproteobacteria genomes using a tblastn search with chlorophyllide reductase BchX  
937 (WP011566468) as a query. This BchX sequence along with another BchX (WP012180173)  
938 were used as an outgroup to root the tree. Phylogeny was inferred by maximum likelihood  
939 methods using 100 bootstraps; bootstrap support of internal nodes is illustrated as open or  
940 closed circles, indicating >70% or >90% bootstrap support, respectively. *nifH* recovered from  
941 the BONCAT-FACS-sorted genome CONS3730E01UFb1, a bin with an accompanying 16S  
942 rRNA amplicon sequence placing it within the SEEP-SRB1g, is highlighted in teal. *nifH* groups  
943 (sensu Raymond et al. [95]) were assigned by comparison with Dekas, et al. 2016, and are

### Correlation analysis reveals new AOM partnerships

944 annotated either by group number or abbreviated as follows: MSL, Methanosarcina-like; MSG,  
945 Methane Seep Group.

946

947 Figure 7. HCR-FISH assays show *in situ* expression of *nifH* in SEEP-SRB1g in association with  
948 ANME-2b in methane seep sediment incubations. ANME-2b (B, G) and SEEP-SRB1g (C, H)  
949 cells labeled with FISH probes ANME-2b-729 (in red, [39]) and newly-designed Seep1g-1443  
950 (in green) with DAPI as the DNA counterstain (A,F). HCR-FISH targeting SEEP-SRB1g *nifH*  
951 mRNA (in yellow; Supp. Table 2) demonstrated active expression of *nifH* transcripts localized to  
952 SEEP-SRB1g cells (D, I), supporting the hypothesis of diazotrophy by partner SRB. Scale bars  
953 in all panels are 5  $\mu\text{m}$ .

954

955 Figure 8. Correlated FISH-nanoSIMS imaging of representative ANME-2b–SEEP-SRB1g  
956 consortia demonstrating active diazotrophy by ANME-2b (B, E) and SEEP-SRB1g (H) cells  
957 through  $^{15}\text{N}$  incorporation from  $^{15}\text{N}_2$ . FISH images of ANME-2b (pink) and SEEP-SRB1g (green)  
958 are shown in panels A, D, G and corresponding nanoSIMS  $^{15}\text{N}$  atom percent values are shown  
959 in panels B, E, and H. Scale bar is 5  $\mu\text{m}$  in panels A, D, G; raster size in panels B, E, and H is  
960 20  $\mu\text{m}^2$ . Violin plots (C, F, I) of  $^{15}\text{N}$  fractional abundance for each type of ROI, representing  
961 single ANME-2b or SEEP-SRB1g cells. The number of ROIs measured is indicated by *n* in each  
962 panel. Diazotrophic activity in ANME-2b cells appears to be correlated with spatial structure,  
963 evidenced by increasing  $^{15}\text{N}$  enrichment in cells located within consortia interiors (E, F). SEEP-  
964 SRB1g cells are also observed to incorporate  $^{15}\text{N}$  from  $^{15}\text{N}_2$ , and appear to be the dominant  
965 diazotroph in the consortium shown in panels G, H, and I, with cellular  $^{15}\text{N}$  enrichment in SEEP-  
966 SRB1g cells greater than that of the paired ANME-2b partner. Abscissa minima set to natural  
967 abundance of  $^{15}\text{N}$  (0.36%).

*Correlation analysis reveals new AOM partnerships*

968

969 Supplemental Table 1. Samples of methane seep sediment used in this study to produce 16S  
970 rRNA amplicon libraries.

971

972 Supplemental Table 2. Newly-designed FISH probe (Seep1g-1443) and *nifH* mRNA HCR-FISH  
973 probe for labeling ANME-associated members of SEEP-SRB1g or SEEP-SRB1g *nifH*  
974 transcripts, respectively. Bolded sequence is complementary to HCR-FISH amplifier B1;  
975 nonbolded sequence is complementary to SEEP-SRB1g 16S rRNA or *nifH* RNA. Matches  
976 determined by comparison with ARB/SILVA SSU release 128 [54].

977

978 Supplemental Table 3. Stable isotope probing incubation conditions, sample sources and sulfide  
979 concentration measurements as a proxy for sulfate reduction activity.

980

981 Supplemental Table 4. SparCC-calculated correlations (pseudo- $p < 0.01$ ) between OTUs,  
982 detailing coefficients, OTU identifiers, and taxonomy assignments.

983

984 Supplemental Figure 1. Optimization of the newly designed Seep1g-1443 probe by FISH  
985 hybridization of ANME-2b—SEEP-SRB1g consortia at a range of formamide concentrations.

986 Supplemental Figure 2. Krona chart depicting relative abundance of taxa in Costa Rica seep  
987 sediment sample #9279 (Fig. 4) as measured by 16S rRNA iTag amplicon sequencing.

988

989 Supplemental Figure 3. Krona chart depicting relative abundance of taxa in Costa Rica seep  
990 sediment sample #9112 (Fig. 4) as measured by 16S rRNA iTag amplicon sequencing.

991

992 Supplemental Figure 4. Krona chart depicting relative abundance of taxa in Costa Rica seep  
993 sediment sample #10073 (Fig. 7) as measured by 16S rRNA amplicon sequencing.



*Correlation analysis reveals new AOM partnerships*

994

995 Supplemental Figure 5. 16S rRNA phylogeny inferred from maximum-likelihood methods using  
996 only full-length 16S rRNA sequences. Tree topology shown here is congruent with the  
997 phylogeny shown in Figure 3 constructed using a mix of shorter iTag amplicon and full-length  
998 16S sequences.

999

1000 Supplemental Figure 6. Extended *nifH* tree including unpublished SEEP-SRB1a MAGs  
1001 possessing *nifH* sequences nearly identical to some recovered in environmental cDNA libraries  
1002 (Dekas, et al. 2016).

1003

1004 Supplemental Figure 7. Negative controls for HCR-FISH experiments, demonstrating absence  
1005 of signal in AOM aggregates with either only initiator or only amplifier added to HCR-FISH  
1006 reactions.

1007

1008 Supplemental File 1. FASTA file containing the translated amino acid sequences for *nifH*  
1009 included in Figure 7 in select ANME and SRB genomes (Chadwick, et al., *in prep*) and  
1010 transcripts [8].

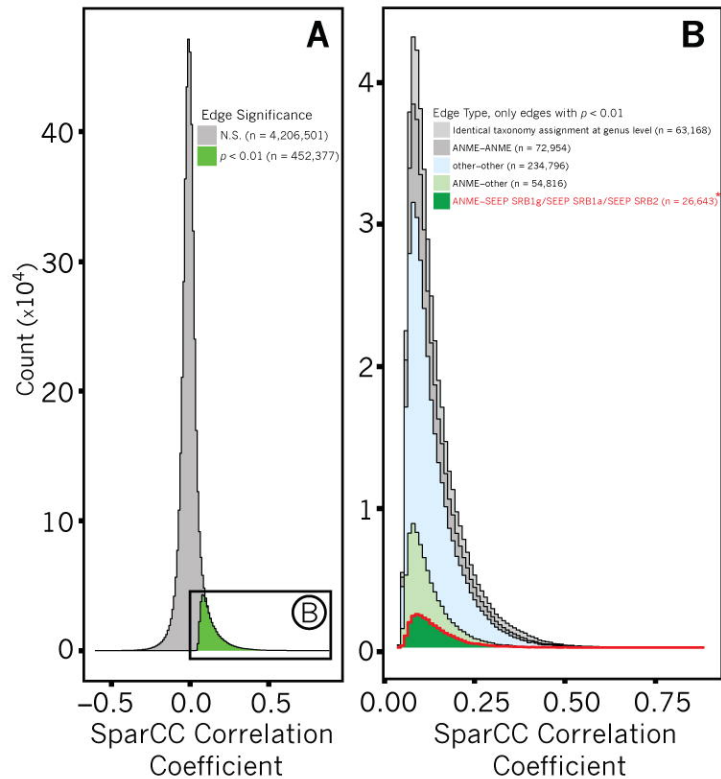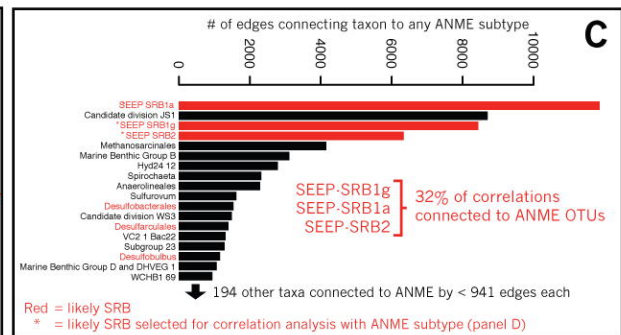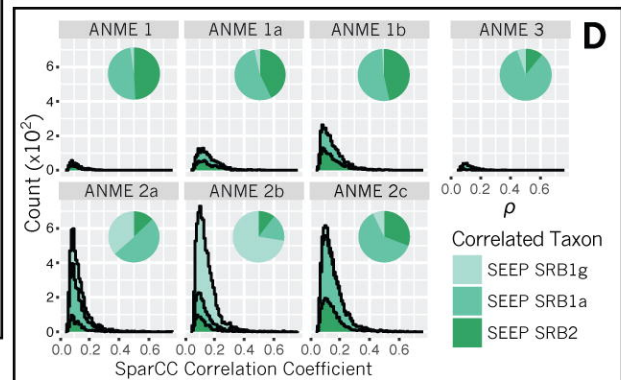

# Taxonomy

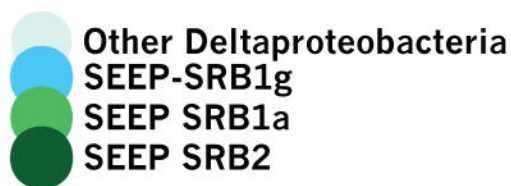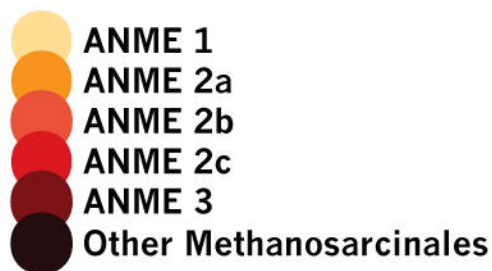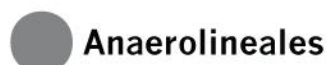

# Mean Read Count

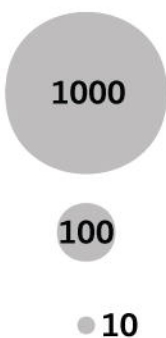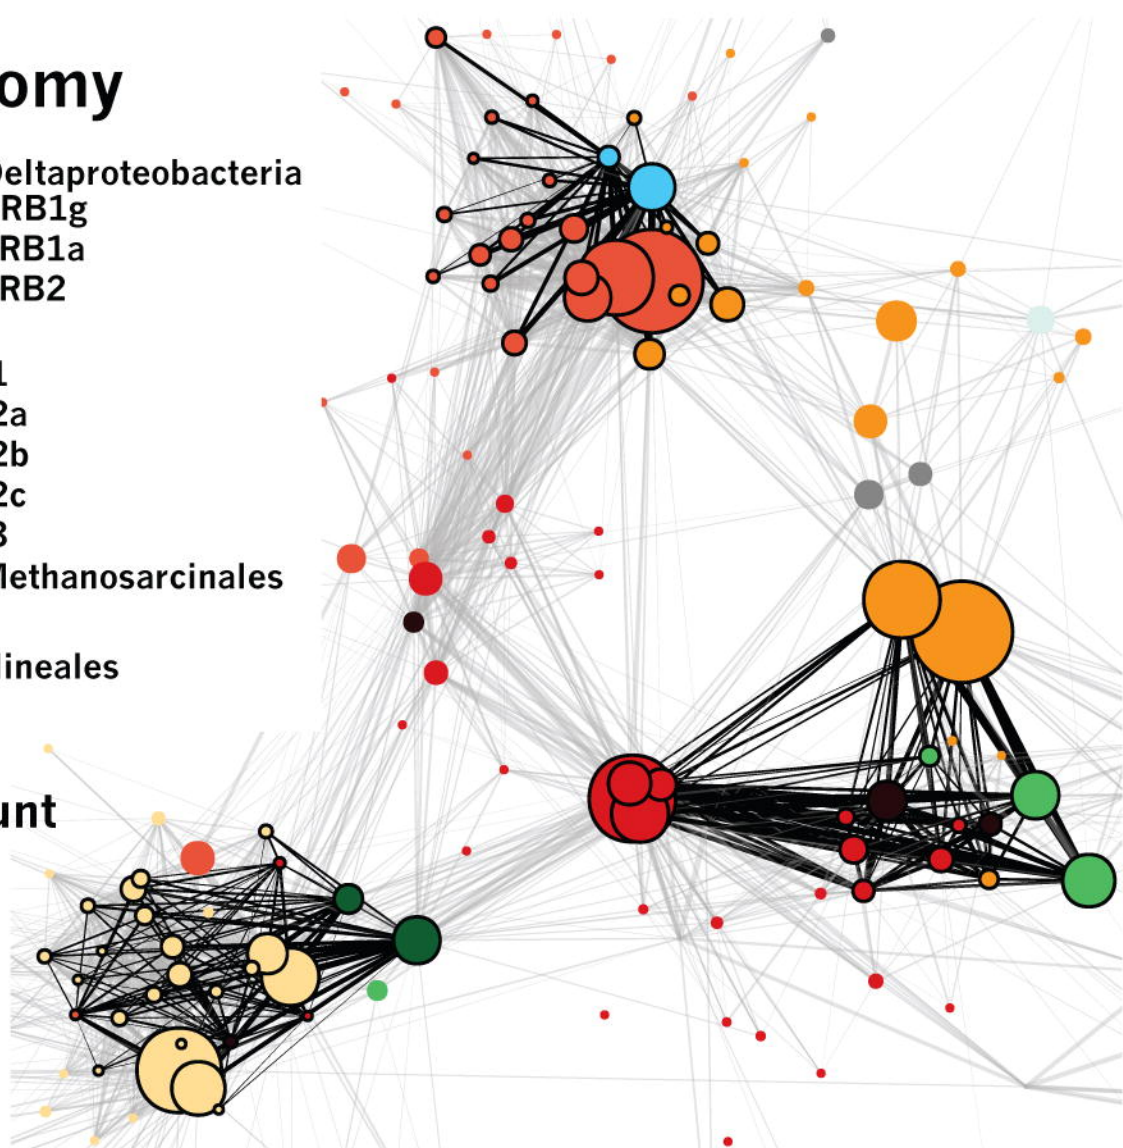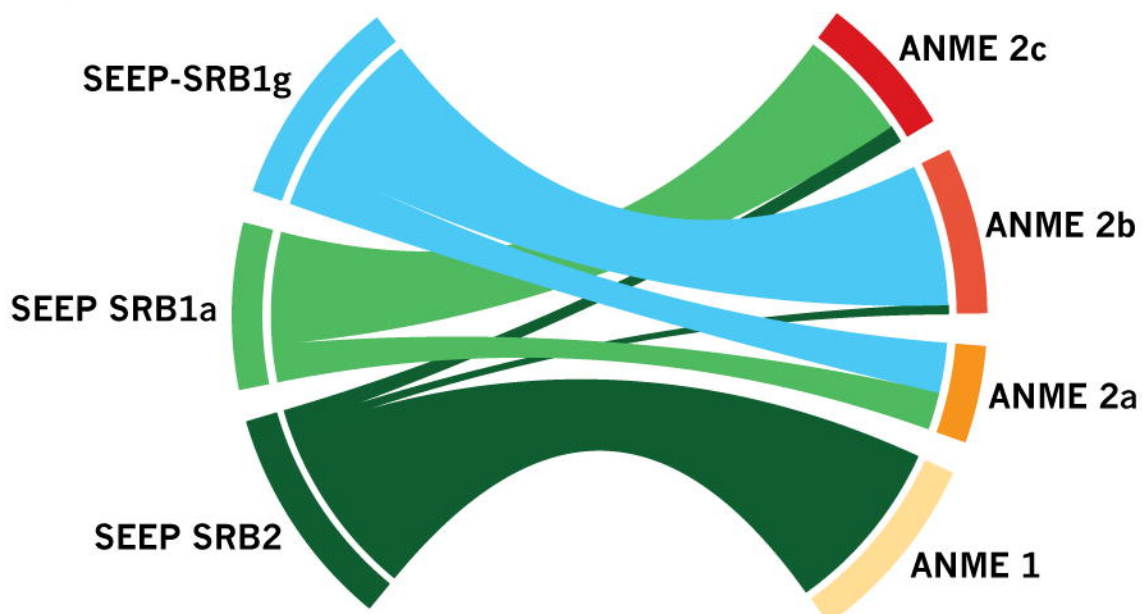

SRB amplicon  
sequence  
associated with:

- ANME 1
- ANME 2a
- ANME 2b
- ANME 2c

**Desulfobacterales sp. PC51MH44**

FACS-sorted ANME-SRB aggregate A03UF iTAG amplicon (KU564230)  
 Uncultured bacterium clone LARIS 67-01C09 (FN550063)  
**FACS-sorted ANME-SRB aggregate C08 iTAG amplicon (KT945204)**  
**FACS-sorted ANME-SRB aggregate A11 iTAG amplicon (KT945219)**  
 Costa Rica methane seep sediment iTAG amplicon denovo1220845  
 Uncultured delta proteobacterium Eel-36e1H1 (AF354164)  
 FACS-sorted ANME-SRB aggregate E01 iTAG amplicon (KT945216)  
 Uncultured bacterium clone AN 3730incN bac B7 (KM356376)  
**FACS-sorted ANME-SRB aggregate UD03 iTAG amplicon (KT945207)**  
**FACS-sorted ANME-SRB aggregate A12 iTAG amplicon (KT945203)**  
**FACS-sorted ANME-SRB aggregate H01UF iTAG amplicon (KU564234)**  
**FACS-sorted ANME-SRB aggregate B12 iTAG amplicon (KT945206)**  
**FACS-sorted ANME-SRB aggregate B07 iTAG amplicon (KT945218)**  
**FACS-sorted ANME-SRB aggregate H05UF iTAG amplicon (KU564233)**  
**FACS-sorted ANME-SRB aggregate C08UF iTAG amplicon (KU564231)**  
**FACS-sorted ANME-SRB aggregate C09 iTAG amplicon (KT945202)**  
**FACS-sorted ANME-SRB aggregate C10 iTAG amplicon (KT945210)**  
 Uncultured bacterium clone AN 3730incN bac A9 (KM356352)  
 Costa Rica methane seep sediment iTAG amplicon denovo2857310  
**FACS-sorted ANME-SRB aggregate A03UF iTAG amplicon (KU564229)**  
 Costa Rica methane seep sediment iTAG amplicon denovo1660670  
**FACS-sorted ANME-SRB aggregate G01UF iTAG amplicon (KU564235)**  
**FACS-sorted ANME-SRB aggregate B09 iTAG amplicon (KT945205)**  
 Uncultured Desulfobacteraceae bacterium CH4-cDNA-16S-P1-36 (KR814179)  
 Uncultured bacterium clone HR12 (JQ036271)  
 Uncultured delta proteobacterium clone SB-24e1E8 (AF354159)  
 Uncultured bacterium clone BC-B1 6h (EU622291)  
 Costa Rica methane seep sediment iTAG amplicon denovo1857740  
 Costa Rica methane seep sediment iTAG amplicon denovo2022355  
**FACS-sorted ANME-SRB aggregate D10UF iTAG amplicon (KT945233)**  
**FACS-sorted ANME-SRB aggregate D12UF iTAG amplicon (KU564240)**  
**FACS-sorted ANME-SRB aggregate H01UF iTAG amplicon (KU564236)**  
**FACS-sorted ANME-SRB aggregate E01UF iTAG amplicon (KT945234)**  
**FACS-sorted ANME-SRB aggregate C08UF iTAG amplicon (KU564239)**  
**FACS-sorted ANME-SRB aggregate C02UF iTAG amplicon (KU564237)**  
**FACS-sorted ANME-SRB aggregate C10UF iTAG amplicon (KU564238)**  
**FACS-sorted ANME-SRB aggregate A10 iTAG amplicon (KT945217)**  
**FACS-sorted ANME-SRB aggregate C04 iTAG amplicon (KT945213)**  
 Uncultured bacterium clone KZNMV-5-B2 (FJ712452)  
 Uncultured delta proteobacterium clone GoM GB425 12B-40 (AY542559)  
 Uncultured bacterium clone B S2688 12 FL (KM356247)  
 Uncultured bacterium MatB0bac98 (GU302433)  
**FACS-sorted ANME-SRB aggregate H06 iTAG amplicon (KT945211)**  
**FACS-sorted ANME-SRB aggregate A02 iTAG amplicon (KT945214)**  
 Desulfosarcina sp. BuS5  
**FACS-sorted ANME-SRB aggregate C12 iTAG amplicon (KT945199)**  
**FACS-sorted ANME-SRB aggregate A12UF iTAG amplicon (KU564217)**  
 Desulfobacter postgatei 2ac9  
 Desulfobacula toluolica Tol2  
 Desulforegula conservatrix Mb1Pa DSM 13527  
 Desulfatirhabdium butyrativorans DSM 18734  
 Desulfonema limicola Jadebusen DSM 2076  
 Desulfococcus biacutus KMRActs  
 Desulfatibacillum aliphaticivorans DSM 15576  
 Desulfatibacillum alkenivorans DSM 16219  
 Desulfosarcina variabilis Montpellier  
 Desulfococcus oleovorans Hxd3  
 Uncultured bacterium clone FeLiveControl B 9 (GQ357013)  
 Uncultured bacterium clone 5bav D6 (EU181463)  
 Uncultured bacterium clone Fe B 141 (GQ356958)  
 Uncultured bacterium clone GB50 Bac A8 (KT152870)  
**Desulfobacterales sp. S7086C20**  
**Desulfobacterales sp. C00003060**  
 Desulfobacterium anilini DSM 4660  
 Desulfobacca acetoxidans ASRB2 DSM 11109  
**FACS-sorted ANME-SRB aggregate A07 iTAG amplicon (KT945208)**  
 Costa Rica methane seep sediment iTAG amplicon denovo1503198  
**FACS-sorted ANME-SRB aggregate F03 iTAG amplicon (KT945215)**  
**FACS-sorted ANME-SRB aggregate G01 iTAG amplicon (KT945221)**  
**FACS-sorted ANME-SRB aggregate D05 iTAG amplicon (KT945222)**  
 Costa Rica methane seep sediment iTAG amplicon denovo3116044  
 Uncultured bacterium clone ORI-934-08-P S258-260 086B10 (JX000639)  
 Uncultured bacterium clone Elba20 Bac D3 (KT899719)  
 Uncultured bacterium clone BAC2 44 KJ569674  
 Uncultured bacterium clone AN 5119N bac H2 (KM356386)  
 Desulfobulbus elongatus DSM 2908  
 Desulfobulbus propionicus 1pr3 DSM 2032  
 Desulfobulbus mediterraneus DSM 13871  
**Desulfobacterales sp. C00003063**  
 Desulfococcus vexinensis DSM 17965  
 Desulfonatronum thioautotrophicum ASO4-1  
 Shewanella oneidensis MR-1

SEEP SRB1a

SEEP-SRB1g

SEEP SRB1c

SEEP SRB2

SEEP SRB4

0.1

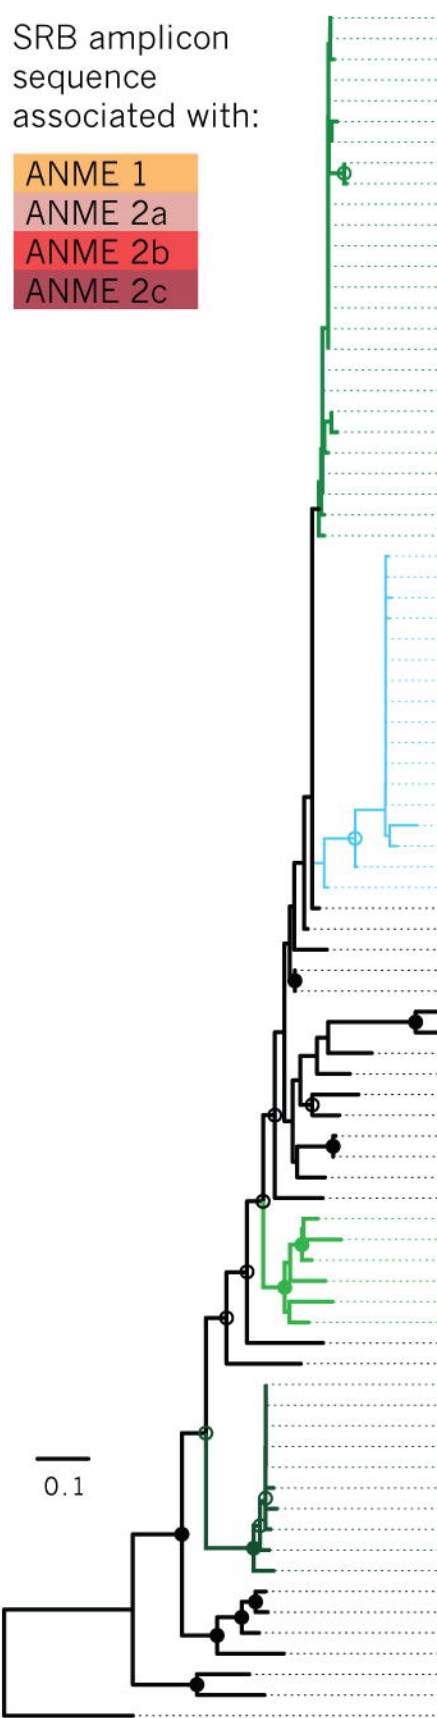

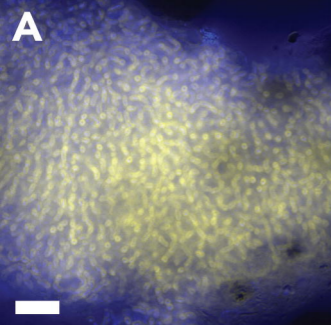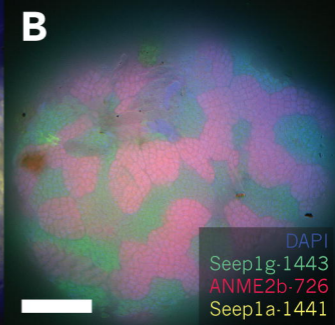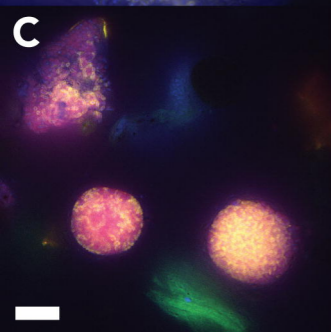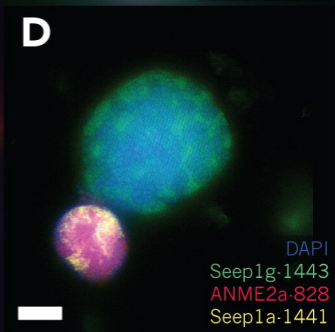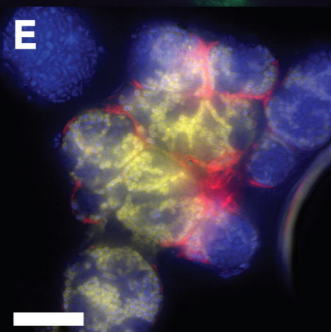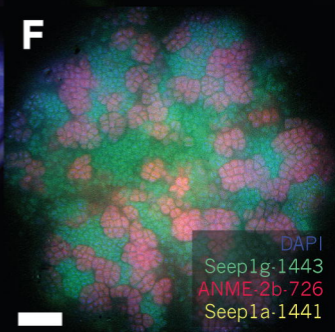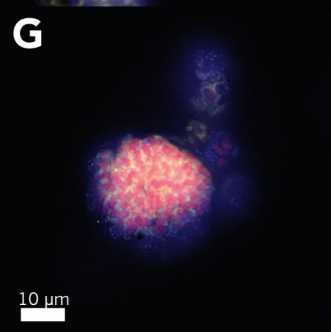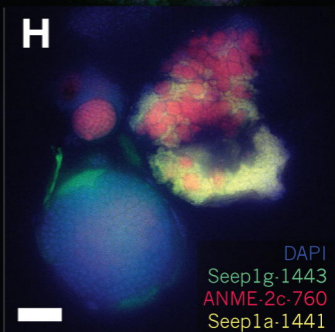

Taxonomy by  
16S in genome (**G**) or  
16S amplicon from FACS (**A**):

SEEP SRB1a  
SEEP SRB1c  
SEEP SRB1g  
SEEP SRB4  
SEEP SRB2

taxonomy inferred  
16S present

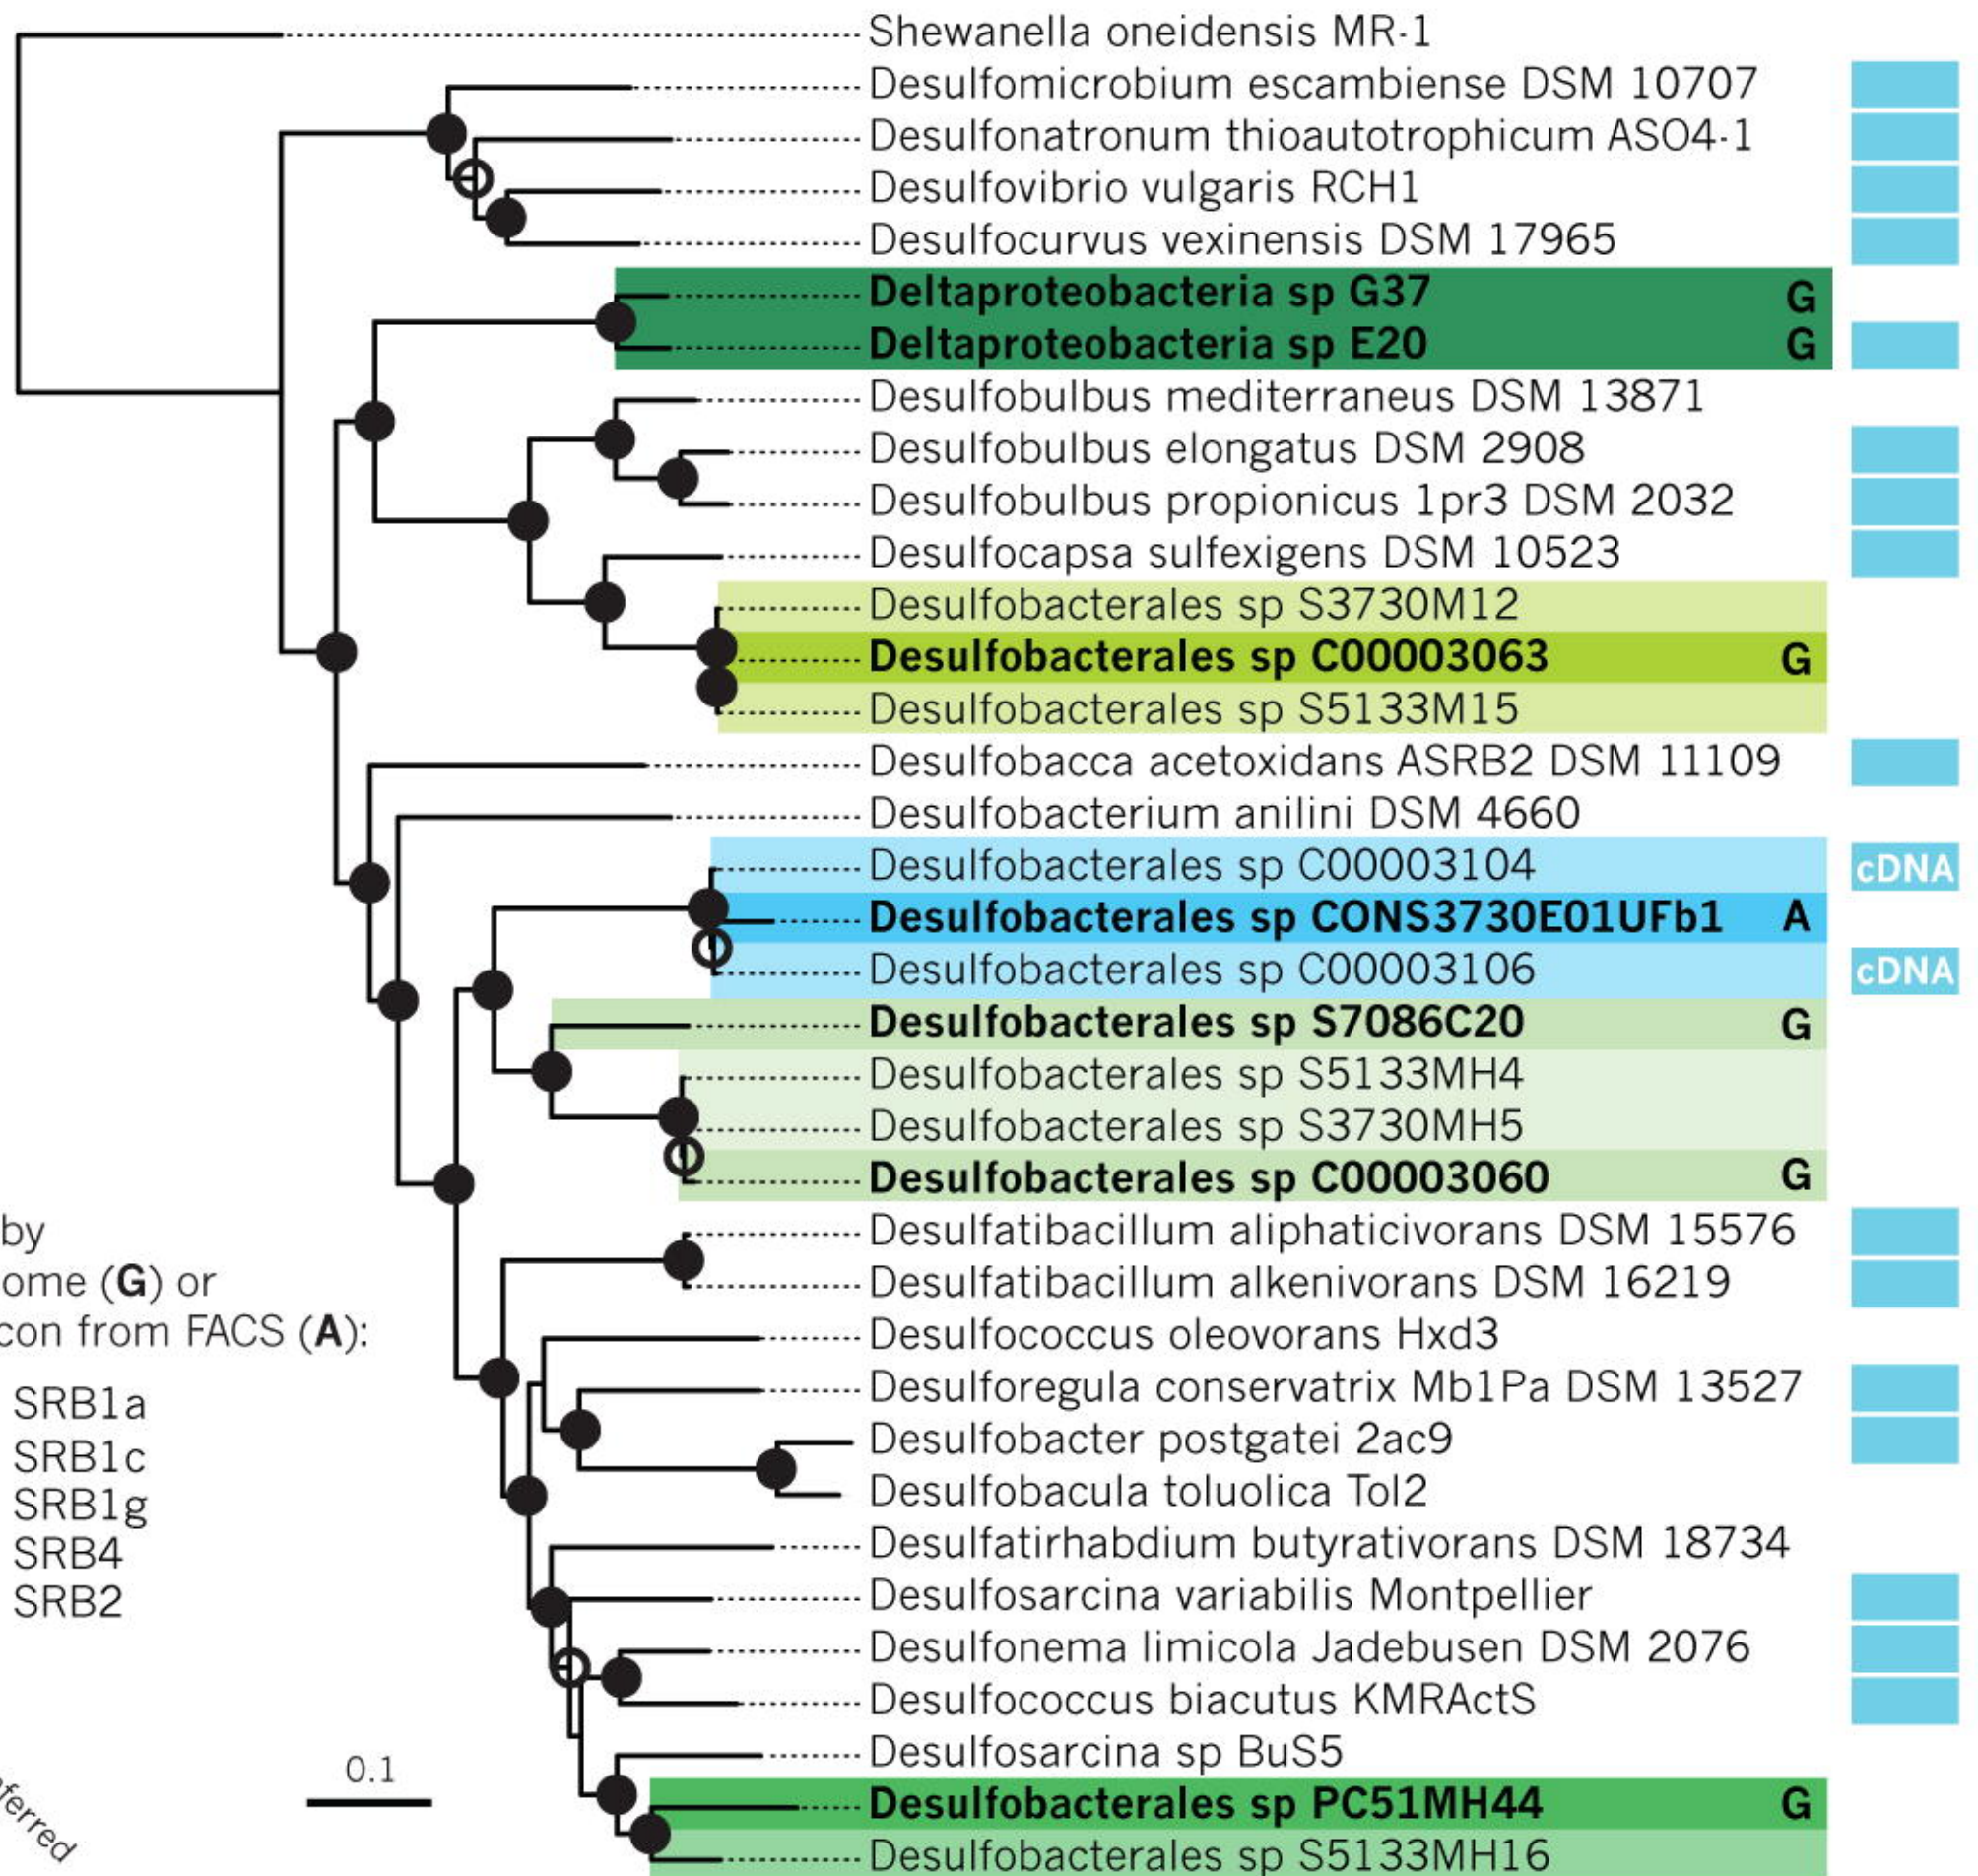

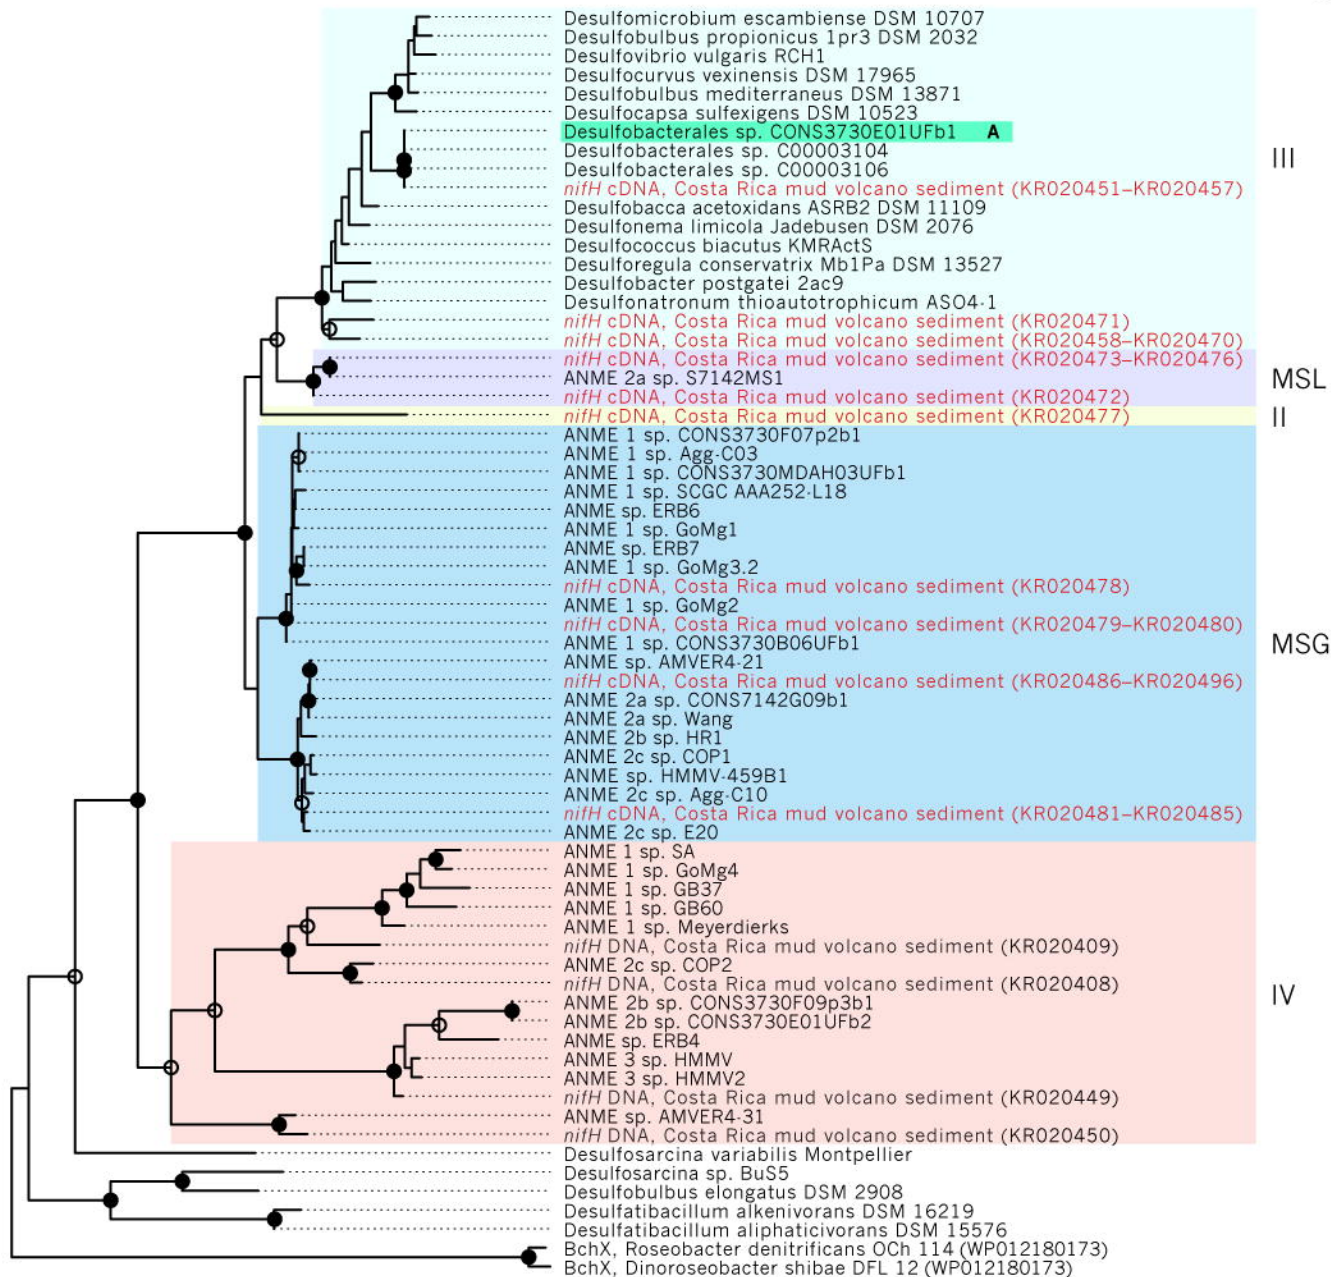

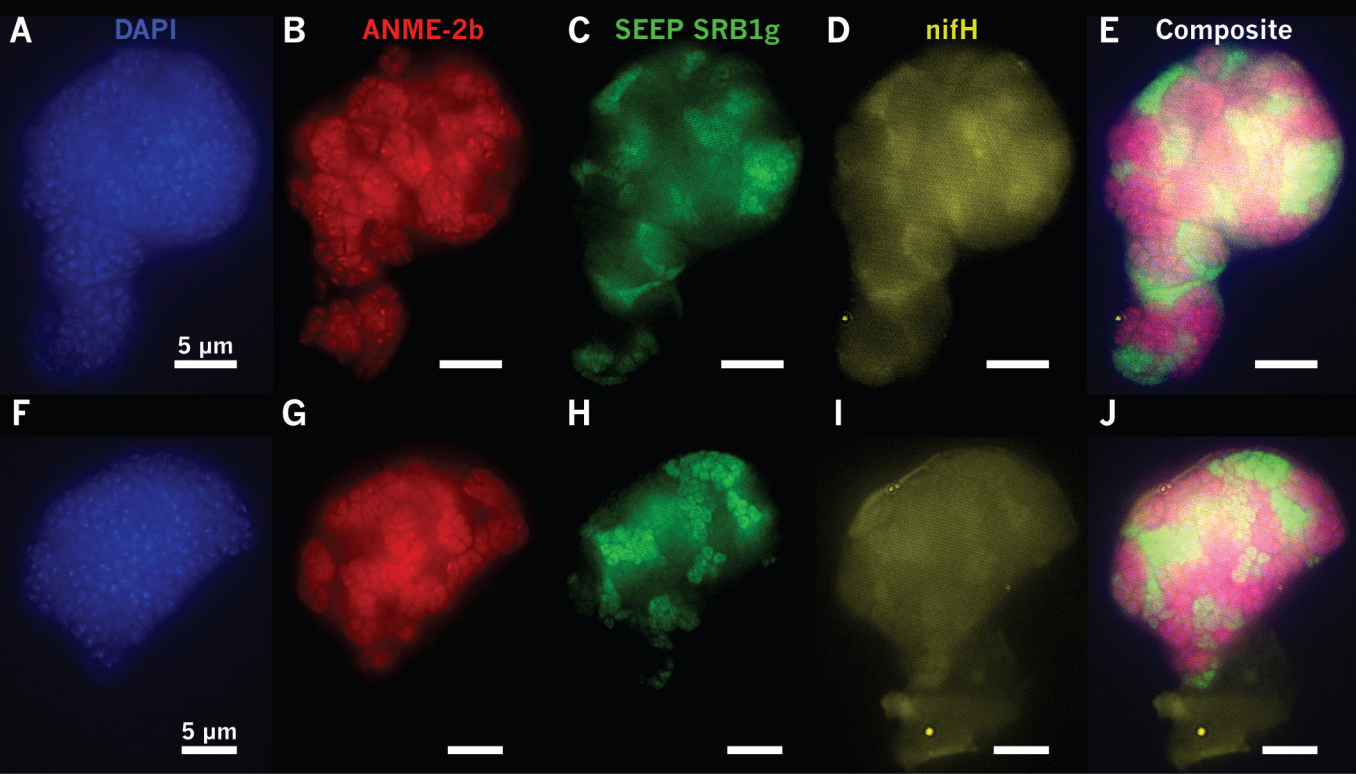



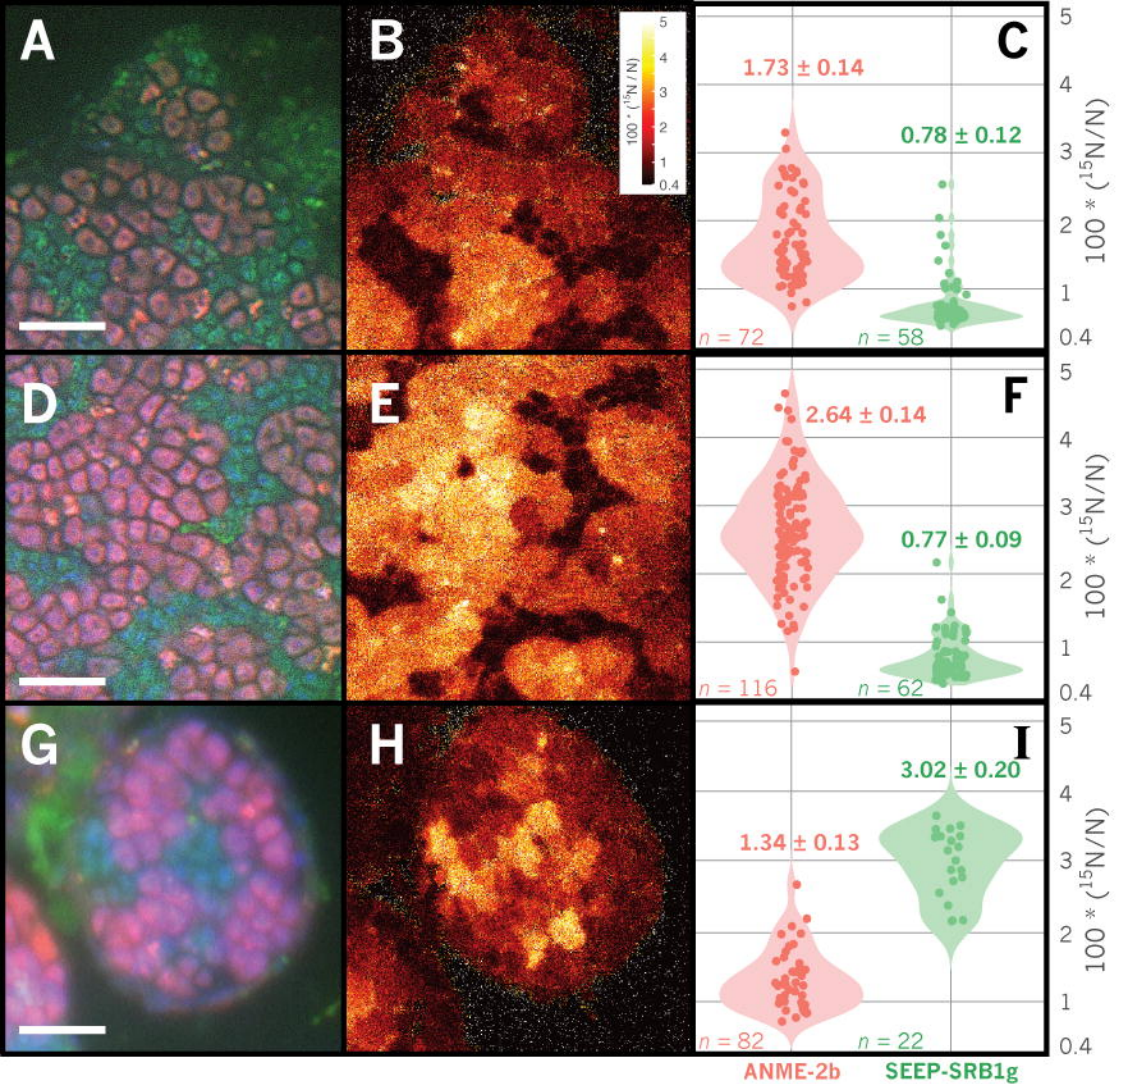

Source: https://www.biorxiv.org/content/10.1101/2020.04.12.038331v1.full.pdf
